# Supplementary material for: Exaggeration and cooption of innate immunity for social defense
Source: PubMed Central journal article supplement — Proc Natl Acad Sci U S A. 2019 Apr 15;116(18):8950–9. doi: 10.1073/pnas.1900917116 (PMC6500135; doi:10.1073/pnas.1900917116), 2019-04-15
Supplement: pnas.1900917116.sapp.pdf [file pnas.1900917116.sapp.pdf]

## SI Appendix

### Exaggeration and co-option of innate immunity for social defense

Mayako Kutsukake<sup>a,1</sup>, Minoru Moriyama<sup>a,b</sup>, Shuji Shigenobu<sup>c</sup>, Xian-Ying Meng<sup>a</sup>, Naruo Nikoh<sup>d</sup>, Chiyo Noda<sup>e</sup>, Satoru Kobayashi<sup>f</sup> and Takema Fukatsu<sup>a,g,h,1</sup>

<sup>a</sup>Bioproduction Research Institute, National Institute of Advanced Science and Technology (AIST), Tsukuba 305-8566, Japan; <sup>b</sup>Computational Bio Big Data Open Innovation Laboratory (CBBD-OIL), AIST, Tsukuba 305-8566, Japan; <sup>c</sup>NIBB Core Research Facilities, National Institute for Basic Biology, Okazaki 444-8585, Japan; <sup>d</sup>Department of Liberal Arts, the Open University of Japan, Chiba 261-8586, Japan; <sup>e</sup>Okazaki Institute for Integrative Bioscience, National Institute for Basic Biology, Okazaki 444-8787, Japan; <sup>f</sup>Life Science Center for Survival Dynamics, Tsukuba Advanced Research Alliance (TARA), University of Tsukuba, Tsukuba 305-8577, Japan; <sup>g</sup>Department of Biological Sciences, Graduate School of Science, University of Tokyo, Tokyo 113-0033, Japan; <sup>h</sup>Graduate School of Life and Environmental Sciences, University of Tsukuba, Tsukuba 305-8572, Japan

<sup>1</sup>To whom correspondence should be addressed.

E-mail: [m-kutsukake@aist.go.jp](mailto:m-kutsukake@aist.go.jp) or [t-fukatsu@aist.go.jp](mailto:t-fukatsu@aist.go.jp)

|                                                                                                                                              |    |
|----------------------------------------------------------------------------------------------------------------------------------------------|----|
| <b>Contents</b> .....                                                                                                                        | 2  |
| <b>SI Materials and Methods</b> .....                                                                                                        | 4  |
| <b>Insect Materials</b> .....                                                                                                                | 4  |
| <b>Collection of Discharged Body Fluid from Soldier Nymphs</b> .....                                                                         | 4  |
| <b>Protein and Enzymatic Analyses</b> .....                                                                                                  | 4  |
| <b>Identification and Cloning of Protein Genes</b> .....                                                                                     | 5  |
| <b>Histological Procedures</b> .....                                                                                                         | 5  |
| <b>Amino Acid Analysis</b> .....                                                                                                             | 6  |
| <b>Lipid Analysis</b> .....                                                                                                                  | 6  |
| <b>Production of Recombinant Proteins</b> .....                                                                                              | 7  |
| <b>In Vitro Clotting Assay</b> .....                                                                                                         | 8  |
| <b>Transcriptomics and Genomics</b> .....                                                                                                    | 8  |
| <b>Bioinformatics</b> .....                                                                                                                  | 9  |
| <b>Molecular Phylogenetic and Evolutionary Analyses</b> .....                                                                                | 9  |
| <br>                                                                                                                                         |    |
| <b>SI References</b> .....                                                                                                                   | 10 |
| <br>                                                                                                                                         |    |
| <b>SI Figure Legends</b> .....                                                                                                               | 11 |
| <br>                                                                                                                                         |    |
| <b>SI Movie Legends</b> .....                                                                                                                | 14 |
| <br>                                                                                                                                         |    |
| <b>SI Figures</b>                                                                                                                            |    |
| <b>Fig. S1.</b> Structure and evolution of PO genes and proteins of <i>N. monzeni</i> .....                                                  | 15 |
| <b>Fig. S2.</b> Gene expression levels in <i>N. monzeni</i> and <i>A. pisum</i> .....                                                        | 16 |
| <b>Fig. S3.</b> Genes and proteins of RCP, RCP-S and fatty acid synthase of <i>N. monzeni</i> .....                                          | 17 |
| <b>Fig. S4.</b> Control experimental data for detection and expression of PO and RCP .....                                                   | 18 |
| <b>Fig. S5.</b> Lipids in soldier's body fluid of <i>N. monzeni</i> .....                                                                    | 19 |
| <b>Fig. S6.</b> Comparison of gene expression profiles of LGC with those of other tissues of <i>N. monzeni</i><br>and <i>A. pisum</i> .....  | 20 |
| <b>Fig. S7.</b> Expression levels of genes related to tyrosine synthesis in bacteriocytes, LGCs and whole<br>body of <i>N. monzeni</i> ..... | 21 |
| <br>                                                                                                                                         |    |
| <b>SI Tables</b>                                                                                                                             |    |
| <b>Table S1.</b> RNA-seq data summary .....                                                                                                  | 22 |
| <b>Table S2.</b> LGC-dominant genes identified by RNA-seq analysis .....                                                                     | 23 |

|                                                                                                         |    |
|---------------------------------------------------------------------------------------------------------|----|
| <b>Table S3.</b> Gene ontology categories enriched in LGC-dominant genes .....                          | 30 |
| <b>Table S4.</b> Highly-expressed genes in <i>A. pisum</i> tissues identified by RNA-seq analysis ..... | 31 |
| <b>Table S5.</b> Expression levels of <i>Buchnera</i> Nmo genes identified by RNA-seq analysis .....    | 33 |

## SI Materials and Methods

**Insect Materials.** Galls of *Nipponaphis monzeni* were collected from *Distylium racemosum* trees at Shinkiba, Tokyo, Japan. Insects collected from the galls were subjected to experiments immediately or preserved in an ultracold freezer until use. Galls of related aphid species, *Nipponaphis distyliicola* and *Neothoracaphis yanonis*, were also collected from *D. racemosum* trees at the same locality. The pea aphid *Acyrtosiphon pisum* strain ApL, which was used for RNA-seq analysis, was collected and established in Sapporo, Hokkaido, Japan (S1).

**Collection of Discharged Body Fluid from Soldier Nymphs.** Upon gall repairing, each soldier nymph excretes 0.01-0.03  $\mu$ l of body fluid from its cornicles. For large scale collection, the discharged body fluid was collected and pooled in distilled water. A soldier nymph was placed in a droplet of 10  $\mu$ l distilled water on a dish and tapped with the tip of a dissection needle, by which the body fluid was discharged into the water pool. This procedure was repeated with up to 75 soldier nymphs, and then the body fluid sample was transferred to a plastic tube on ice using a micropipette. Each body fluid sample for SDS-PAGE or immunoblotting was prepared in 2  $\mu$ l of distilled water with 15 soldier nymphs, whereas each body fluid sample for enzymatic assay was prepared in 20  $\mu$ l of 0.1 M HEPES buffer (pH 7.0) with 100 soldier nymphs. For small scale collection, a soldier nymph was placed upside down on a dish and tapped with a dissection needle, and each cornicle droplet was collected with a 0.5  $\mu$ l microcapillary tube (Drummond, Microcaps). After recording the volume, the body fluid was immediately pushed out into distilled water in a plastic tube on ice using a bulb dispenser. These body fluid samples were used for experiments immediately or preserved in an ultracold freezer until use.

**Protein and Enzymatic Analyses.** SDS-PAGE and immunoblotting were performed as described previously (S2). The antiserum against proPO of the silkworm *Bombyx mori* was provided by Dr. Tsunaki Asano (S3). The antisera against RCP and RCP-S were prepared by immunizing rabbits with synthetic peptides (CQGSGQGSYTEHEQG for RCP and CVDRNQGQGFQNNKHG for RCP-S, respectively), which were designed on the basis of amino acid sequences deduced from cDNA sequences (see *SI Appendix*, Fig. S3A). The antiserum against no. 3 band protein, identified as a fatty acid synthase (see *SI Appendix*, Fig. S3F), was prepared in the same way with a synthetic peptide SNSSETDDYLSRSPDY. PO activity assay was performed as described previously with some modifications (S4). Each body fluid sample was prepared from 100 soldier nymphs in 20  $\mu$ l of 0.1M HEPES buffer (pH 7.0) with or without 10 mM 1-phenyl-2-thiourea. Each whole body sample was prepared from 12-15 soldier nymphs, 12-15 middle-instar aphids, or 15-30 apterous adults of *N. monzeni*; from 40 first-instar nymphs or 15 apterous adults of *N. distyliicola*; or from 30 fourth-instar nymphs of *N. yanonis*. The insects were homogenized in 100  $\mu$ l of 0.1M HEPES buffer (pH 7.0) and

centrifuged at 4°C. The supernatant was combined with a reaction buffer (0.1 M HEPES buffer [pH 7.0], 5 mM CaCl<sub>2</sub>, 0.2 mM L-DOPA) with 1 µg of trypsin for PO activation in the final volume of 1 ml. The enzymatic activity was measured by continuous monitoring of OD<sub>490</sub> for 60 min using a photospectrometer (Beckman Coulter DU-7000) at room temperature around 22°C, wherein one unit of PO activity was defined as 0.01 increase of OD<sub>490</sub> in 60 min. In case that enzymatic activity was not detectable within 60 min, the measurement was extended up to for 240 min. Total protein concentration in each sample was quantified using Bio-Rad protein assay kit (Bio Rad).

**Identification and Cloning of Protein Genes.** Protein bands were excised from SDS-PAGE gels. Since N-terminal amino acid sequencing of our target proteins tended to fail probably due to chemical blocking, their internal peptide sequences were analyzed. In-gel digestion was performed using V8 protease or lysyl endopeptidase. The digested peptides were electrophoresed, blotted onto polyvinylidene difluoride membranes, and subjected to N-terminal amino acid sequencing using a protein sequencer (Applied Biosystems, Procise 494HT or 491cLC). The following internal amino acid sequences were determined: three sequences (AALADDSKE, EVAVAEED and VEVLTDNQTLKPNGN) for the no. 5 protein band (PO); two sequences (HLESGHR and HQQQEFASVTFS) for the no. 6 protein band (RCP); and two sequences (DLLSNILK and ELDYQTVFDQIA) for the no. 3 protein band (fatty acid synthase). Based on the internal amino acid sequences, degenerate DNA primers were synthesized, internal gene fragments were PCR-amplified, cloned and sequenced, and their full-length cDNA sequences were determined by the 5'- and 3'-rapid amplification of cDNA ends procedure. MALDI-TOF/MS (Shimadzu, AXIMA-CFR plus) was used for direct measurement of molecular mass of RCPs in the body fluid samples. In genomic Southern hybridization, a digoxigenin-dUTP labeled DNA probe synthesized from full-length RCP cDNA was hybridized to *Eco*RI- or *Hind* III-digested genomic DNA of *N. monzeni*.

**Histological Procedures.** Close morphological observations were conducted using a scanning electron microscope (JEOL, JCM-6000 NeoScope™). Transmission electron microscopy was performed as described previously (S5). In situ hybridization essentially followed the procedure described previously (S6). For PO and RCP, 0.2 kb gene fragments were cloned into pBluescript SK vector, and sense and antisense probes were synthesized using T7 and T3 RNA polymerases in the presence of digoxigenin-11-UTP. Paraffin tissue sections of adult insects containing soldier embryos were subjected to hybridization at 50°C overnight, and localization of bound probes was visualized using an anti-digoxigenin secondary antibody labelled with alkaline phosphatase and NBT/BCIP (Merck) as a chromogenic substrate. Immunohistochemistry was performed essentially as described previously (S7) with some modifications. Soldier nymphs were decapitated and fixed in ethanol-formalin (3:1) at 4°C overnight, embedded in Technovit 8100 resin (Kulzer), processed into 3 µm

sections and mounted on glass slides. The tissue sections were incubated with blocking solution containing 10% normal goat serum for 1 h, and then with primary antibody solution (1:5000 dilution) containing 10% normal goat serum for 3 h. After washing, the tissue sections were incubated with HistoFine Simple stain MAX-PO(R) (Nichirei Bioscience) for 30 min, washed and incubated with HistoFine Simple stain DAB solution (Nichirei Bioscience) for 20 min to detect brownish signals, and then counterstained with hematoxylin. Immunoelectron microscopy was conducted essentially as described previously (S8). Soldier nymphs were decapitated and prefixed in 4% paraformaldehyde and 0.5% glutaraldehyde, postfixed in 1% osmium tetroxide, embedded in Lowicryl HM20 resin (Polysciences), processed into 100 nm ultrathin sections, and mounted on nickel grids. The ultrathin sections were incubated with blocking solution containing 1% bovine serum albumin (BSA) for 10 min, and then with primary antibody solution (1:1500 dilution for PO or 1:300 dilution for RCP, respectively, with 1% BSA) for 90 min. After washing, the ultrathin sections were incubated with secondary antibody solution (1:50 dilution of 20 nm colloidal gold-conjugated anti-rabbit antibody) for 60 min, re-fixed with 0.5% glutaraldehyde, stained with 2% uranyl acetate and lead citrate, and observed under a transmission electron microscope. Histochemical detection of polysaccharides by periodic acid and Schiff's reagent was performed on paraffin tissue sections as described previously (S9). Lipid detection on frozen tissue sections with oil red O was conducted as described previously (S10).

**Amino Acid Analysis.** Amino acids were analyzed by liquid chromatography and mass spectrometry systems (LC/MS) as described previously (S11). The discharged body fluid samples and extracted hemolymph samples were dissolved in 80% methanol solution and stored at  $-80^{\circ}\text{C}$  until use. Amino acids and related amines, including L-DOPA and dopamine, were purified by passing through a solid-phase extraction column (GL-Tip SDB, GL-Science) and derivatized with propyl-chloroformate (S12). Their quantification was performed using a Prominence LC system (Shimadzu) coupled with an LCQ Duo MS (Thermo Scientific) or an H-class LC system coupled with a TQ-S micro MS (Waters). The derivatized amino acids were separated using a reverse-phase C18 column (FC-ODS, 2 mm i.d. x 150 mm, Shimadzu) under a gradient condition of water containing 0.05% formic acid and 2.5 mM ammonium formate and methanol at a flow rate of 0.2 ml/min, and their protonated ions were monitored in the Electro-Spray Ionization (ESI) positive mode. Homophenylalanine was used as an internal standard.

**Lipid Analysis.** The global lipid profiles of *N. monzeni* secretion were analyzed using an LC/MS as described (S13). The lipid fraction was extracted with chloroform and diluted by 20 times in 2-propanol. The diluted samples were separated using a C18 column (FC-ODS, 2 mm i.d. x 150 mm, Shimadzu) in a Prominence LC system (Shimadzu) coupled with an LCQ Fleet MS (Thermo

Scientific), under a gradient condition of water:acetonitrile (4:6) containing 10 mM ammonium formate and acetonitrile:2-propanol containing 10 mM ammonium formate (1:9) at a flow rate of 0.2 ml/min. In ESI positive mode, triglycerides were detected as adduct ions  $[M + NH_4]^+$ . The detected triglyceride ions were further subjected to MS/MS fragment analyses to identify acyl-chain length and the number of saturation. The composition ratio of each triglyceride was estimated based on the relative peak intensity of the parent ion. The fatty acid composition of the lipid fraction was quantified by using a 2-nitrophenylhydrazine derivatization method (S14) after the free fatty acids were liberated by alkaline hydrolysis. The derivatized fatty acids were analyzed using the above-mentioned LC/MS system with the same C18 column under a gradient condition of 5 mM ammonium formate and methanol at a flow rate of 0.2 ml/min. Quantification was performed based on absorbance at 390 nm, while mass information obtained by the MS was also used for fatty acid identification. Undecanoic acid (C11:0) was used as an internal control.

**Production of Recombinant Proteins.** Recombinant PO protein was produced using the Sf9 insect culture cells and the Bac-to-Bac Baculovirus Expression System (Thermo Fisher Scientific). The PO cDNA containing the full-length open reading frame with 6 x histidine tag at the N-terminus was ligated to the pFastBac1 vector, by which an expression plasmid was constructed. Transfection was performed according to the manufacturer's protocol. A high-titer recombinant baculovirus solution was added to Sf9 cells in Sf-900 II SFM medium containing 0.25 mM  $CuSO_4$ , and incubated at 28°C for 68 h. Then, the cells were collected and homogenized in 10 mM Tris-HCl (pH7.5) supplemented with the protease inhibitor cocktail cOmplete Mini (Roche). For purification, the recombinant PO protein was bound to His Mag Sepharose Ni beads (GE healthcare), washed and eluted in an elution buffer (20 mM sodium phosphate [pH 7.4], 500 mM NaCl, 200 mM imidazole). Recombinant RCP protein was produced using *Escherichia coli* and the pET system. The RCP cDNA encoding a polypeptide of 354 amino acid residues, which contains 31 repeat motifs in the middle region (see Fig. 2F), was ligated to the pET15b vector, and the plasmid was transformed into the BL21(DE3)pLysS *E. coli* strain. Induction of the recombinant RCP protein was performed by an addition of 1 mM isopropyl- $\beta$ -D-thiogalactopyranoside to the bacterial culture in the log growth phase. The recombinant RCP protein was purified using the GraviTrap affinity column (GE healthcare) in the elution buffer. Desalting, buffer exchange and concentration of the recombinant proteins were performed using Amicon Ultra centrifugal filter devices (Millipore). Since the recombinant RCP protein was highly adhesive to plastic tubes, a detergent-supplemented buffer (50 mM sodium phosphate buffer (pH7.0), 0.001% Tween 80) was used. The purified recombinant proteins were quantified by 2-D Quant kit (GE healthcare) using BSA as a standard protein. On native-PAGE gels, PO activity staining was performed at 4°C by incubating in 25 mM potassium phosphate buffer (pH6.3) containing an excess amount of L-DOPA and 42% 2-propanol for proPO

activation (S15).

**In Vitro Clotting Assay.** Concentrations of PO and RCP proteins in the discharged body fluid of soldier nymphs were evaluated densitometrically on the basis of band intensity of SDS-PAGE gels in comparison with each recombinant protein of known concentration. For in vitro clotting assay, a standard 6  $\mu$ l reaction mixture consisted of 4  $\mu$ l of 2.3  $\mu$ g/ $\mu$ l recombinant PO, 0.3  $\mu$ l of 9  $\mu$ g/ $\mu$ l recombinant RCP, 0.5  $\mu$ l of 40 mM tyrosine disodium in 50 mM sodium phosphate (pH7.0), and 1.2  $\mu$ l of 2-propanol, while some of the components might be either removed, replaced, increased or decreased for experimental purposes (see Fig. 5). The reaction mixtures were incubated at 25°C for 60 min and photographed. For electrophoretic crosslinking assay, the reaction mixtures were added with 6  $\mu$ l of 2 x SDS-PAGE lysis buffer to stop the reaction at different time intervals, boiled for 2 min, and then subjected to SDS-PAGE.

**Transcriptomics and Genomics.** Total RNA was extracted from insects collected from a single gall of *N. monzeni*. LGCs sampled from 50 soldier nymphs were pooled in RNAlater (TaKaRa) and subjected to RNA extraction. Embryos were dissected from adult insects in cold phosphate buffered saline containing 0.1 % Tween 20 and immediately transferred to RNAlater reagent (TaKaRa). The remaining parts of the body (adult carcasses) were also subjected to RNA preparation. Six types of samples, namely LGCs, whole bodies of soldier nymphs, whole bodies of middle-instar insects, whole bodies of adults, dissected soldier embryos, and adult carcasses, were homogenized in 1 ml of RNAlater reagent, mixed with 0.2 ml chloroform, and centrifuged. About 0.5 ml of the supernatant and an equal volume of 70 % ethanol were mixed and transferred to RNeasy column supplied in RNeasy Mini kit (QIAGEN), and subsequent procedures were performed according to the manufacture's protocol. For bacteriocytes, bacteriome from 50 soldier nymphs or 50 adult insects were dissected in cold phosphate buffered saline containing 0.1 % Tween 20, pooled in RNAlater reagent, and total RNA was extracted. For obtaining tissue-specific RNA-seq data, total RNA was extracted from hemolymph (hemocytes), fat body, gut and whole body of *A. pisum* ApL strain. Legs of about 200 adult insects were cut by a razor, and exuding hemolymph droplets were collected by 0.5  $\mu$ l microcapillary glass tubes (Drummond Scientific) and immediately transferred to a plastic tube on ice containing RNAlater reagent. Fat bodies and guts were dissected from 50 and 20 adult insects, respectively, and subjected to RNA preparation. Each cDNA library was prepared from 0.5 to 1  $\mu$ g of total RNA with TruSeq™ RNA Sample Preparation Kit v2 (Illumina) according to the manufacture's protocol. For RNAseq of *Buchnera* genes, rRNA was removed from total RNA using Ribo-Zero Gold rRNA Removal Kit (Epidemiology) (Illumina), and then the remaining RNA was subjected to cDNA library preparation. The quality of the libraries was inspected by an Agilent Bioanalyzer 2100 (Agilent Technologies). Paired-end or single-end sequence for each read was analyzed by Illumina HiSeq 1500/2000/2500/X



Ten. These RNA-seq data are summarized in Table S1 with accession numbers. For genome sequencing of *Buchnera* Nmo, bacteriocytes collected from 15 aphids derived from a single gall were subjected to genomic DNA extraction using QIAamp DNA Mini kit (Qiagen). The genomic DNA was sheared using Covaris S2 ultrasonication system (Covaris), and then the DNA fragments, which was about 350 bp in size, were collected by Pippin Prep (Sage Science). The DNA library was prepared from 100 ng genomic DNA with TruSeq™ Nano DNA Sample Prep Kit (Illumina). Paired-end sequence for each read was analyzed by Illumina MiSeq.

**Bioinformatics.** De novo assembling of raw reads of *N. monzeni* (rep1) was performed using the program Trinity program (S16). The assembled contigs were revised by replacing the incomplete short contigs of the RCP and RCP-S genes to the full-length cDNA sequences determined by molecular cloning procedures as described. Then, the reads were mapped to the revised contigs using the CLC Genomics Workbench software (Qiagen). The transcript expression levels were estimated by calculating transcripts per kilobase million (TPM) values. Genes were annotated by BLASTx searches (e-value threshold at 1E-5). Differentially expressed genes among *N. monzeni* libraries were statistically estimated by the EdgeR (S17). In this study, genes whose TPM value in the LGC library was at least twice larger than those of the other 5 libraries were regarded as “LGC-dominant genes”. Gene Ontology (GO) terms enriched in LGC-dominant genes were analyzed using the GSeq application (S18). Genome and gene ID packages for fruit fly (org.Dm.eg.db) were used to link the aphid genes to the GO categories. Principle component analysis was performed using the software R 3.5.1 (S19). Cluster analysis was performed using the program Heatplus (S20). In tissue-specific RNAseq of *A. pisum*, raw reads were mapped to the sequences of the Official Gene Consensus Set ACYPI mRNA v2.1b downloaded from AphidBase (<http://www.aphidbase.com/aphidbase/>). Hemocyte- and fat body-dominant genes were defined as genes whose TPM value in each tissue library was at least twice larger than that of the whole body library. De novo assembly of whole genome sequence of *Buchnera* Nmo was performed using the program Velvet (S21). The sequence was manually corrected after remapping of raw reads to the assembled genome sequence. Genes were annotated using the MiGAP pipeline (S22). Gene expression levels were estimated by mapping RNAseq reads to the assembled genome sequence by using the CLC Genomics Workbench software. The accession numbers for the genomic sequences are indicated in Figure 7.

**Molecular Phylogenetic and Evolutionary Analyses.** Multiple alignments of amino acid sequences were generated using the program MUSCLE implemented in the software MEGA7 (S23). Model selection and maximum-likelihood phylogenies were also constructed using the MEGA7. Relative rate tests were performed using the program RRTree (S24).

## SI References

- S1. T. Kanbe, S. Akimoto, Allelic and genotypic diversity in long-term asexual populations of the pea aphid, *Acyrtosiphon pisum* in comparison with sexual populations. *Mol. Ecol.* **18**, 801-816 (2009).
- S2. T. Fukatsu, Acetone preservation: a practical technique for molecular analysis. *Mol. Ecol.* **8**, 1935-1945 (1999).
- S3. T. Asano, K. Takebuchi, Identification of the gene encoding pro-phenoloxidase A3 in the fruitfly, *Drosophila melanogaster*. *Insect Mol. Biol.* **18**, 223-232 (2009).
- S4. M. S. Zufelato, A. P. Lourenco, Z. L. Simoes, J. A. Jorge, M. M. Bitondi, Phenoloxidase activity in *Apis mellifera* honey bee pupae, and ecdysteroid-dependent expression of the prophenoloxidase mRNA. *Insect Biochem. Mol. Biol.* **34**, 1257-1268 (2004).
- S5. M. Kutsukake, X. Y. Meng, N. Katayama, N. Nikoh, H. Shibao, T. Fukatsu, An insect-induced novel plant phenotype for sustaining social life in a closed system. *Nat. Commun.* **3**, 1187 (2012).
- S6. M. Kutsukake, H. Shibao, N. Nikoh, M. Morioka, T. Tamura, T. Hoshino, S. Ohgiya, T. Fukatsu, Venomous protease of aphid soldier for colony defense. *Proc. Natl. Acad. Sci. USA.* **101**, 11338-11343 (2004).
- S7. H. Salem, E. Bauer, R. Kirsch, A. Berasategu, M. Cripps, B. Weiss, R. Koga, K. Fukumori, H. Vogel, T. Fukatsu, M. Kaltenpoth, Drastic genome reduction in an herbivore's pectinolytic symbiont. *Cell* **171**, 1520-1531 (2017).
- S8. R. Amikura, K. Hanyu, M. Kashikawa, S. Kobayashi, Tudor protein is essential for the localization of mitochondrial RNAs in polar granules of *Drosophila* embryos. *Mech. Dev.* **107**, 97-104 (2001).
- S9. T. Nishino, M. Tanahashi, C. P. Lin, R. Koga, T. Fukatsu, Fungal and bacterial endosymbionts of eared leafhoppers of the subfamily Ledrinae (Hemiptera: Cicadellidae). *Appl. Entomol. Zool.* **51**, 465-477 (2016).
- S10. K. Uematsu, M. Kutsukake, T. Fukatsu, M. Shimada, H. Shibao, Altruistic colony defense by menopausal female insects. *Curr. Biol.* **20**, 1182-1186 (2010).
- S11. H. Anbutsu, M. Moriyama, N. Nikoh, T. Hosokawa, R. Futahashi, M. Tanahashi, X. Y. Meng, T. Kuriwada, N. Mori, K. Oshima, M. Hattori, M. Fujie, N. Satoh, T. Maeda, S. Shigenobu, R. Koga, T. Fukatsu, Small genome symbiont underlies cuticle hardness in beetles. *Proc. Natl. Acad. Sci. USA* **114**, E8382-E8391 (2017).
- S12. P. Uutela, R. A. Ketola, P. Piepponen, R. Kostianen, Comparison of different amino acid derivatives and analysis of rat brain microdialysates by liquid chromatography tandem mass spectrometry. *Anal. Chim. Acta* **633**, 223-231 (2009).
- S13. K. Ikeda, Y. Oike, T. Shimizu, R. Taguchi, Global analysis of triacylglycerols including oxidized molecular species by reverse-phase high resolution LC/ESI-QTOF MS/MS. *J. Chromatogr. B:*

*Anal. Technol. Biomed. Life Sci.* **877**, 2639–2647 (2009).

- S14. H. Miwa, M. Yamamoto, Liquid chromatographic determination of free and total fatty acids in milk and milk products as their 2-nitrophenylhydrazides. *J. Chromatogr. A* **523**, 235–246 (1990).
- S15. N. Asada, T. Fukumitsu, K. Fujimoto, K. Masuda, Activation of prophenoloxidase with 2-propanol and other organic compounds in *Drosophila melanogaster*. *J. Exp. Zool.* **23**, 515-520 (1993).
- S16. M. G. Grabherr, B. J. Haas, M. Yassour, J. Z. Levin, D. A. Thompson, I. Amit, X. Adiconis, L. Fan, R. Raychowdhury, Q. D. Zeng, Z. H. Chen, E. Mauceli, N. Hacohen, A. Gnirke, N. Rhind, F. di Palma, B. W. Birren, C. Nusbaum, K. Lindblad-Toh, N. Friedman, A. Regev, Full-length transcriptome assembly from RNA-Seq data without a reference genome. *Nat. Biotechnol.* **29**, 644-652 (2011).
- S17. M. D. Robinson, D. J. McCarthy, G. K. Smyth, edgeR: a Bioconductor package for differential expression analysis of digital gene expression data. *Bioinformatics* **26**, 139-140 (2010).
- S18. M. D. Young, M. J. Wakefield, G. K. Smyth, A. Oshlack, Gene ontology analysis for RNA-seq: accounting for selection bias. *Genome Biol.* **11**, R14 (2010).
- S19. R Core Team, R: A language and environment for statistical computing. R Foundation for Statistical Computing, Vienna, Austria. <https://www.R-project.org/> (2018).
- S20. A. Ploner, Heatplus: Heatmaps with row and/or column covariates and colored clusters. R package version 2.26.0. <https://github.com/alexploner/Heatplus> (2015).
- S21. D. R. Zerbino, E. Birney, Velvet: algorithms for de novo short read assembly using de Bruijn graphs. *Genome Res.* **18**, 821-829 (2008).
- S22. H. Sugawara, A. Ohya, H. Mori, K. Kurokawa, "Microbial Genome Annotation Pipeline (MiGAP) for diverse users". The 20th International Conference on Genome Informatics (GIW2009) Poster and Software Demonstrations (Yokohama), S001-1-2 (2009).
- S23. S. Kumar, G. Stecher, K. Tamura, MEGA7: Molecular Evolutionary Genetics Analysis version 7.0 for bigger datasets. *Mol. Biol. Evol.* **33**, 1870-1874 (2016).
- S24. M. Robinson-Rechavi, D. Huchon, RRTree: relative-rate tests between groups of sequences on a phylogenetic tree. *Bioinformatics* **16**, 296-297 (2000).

## SI Figure Legends

**Fig. S1.** Structure and evolution of PO genes and proteins of *N. monzeni*. (A) Full-length cDNA sequence of the soldier-specific PO gene. Estimated open reading frame and amino acid sequence are also shown. Putative copper-binding histidine residues are shaded. (B) Molecular phylogeny of PO genes of *N. monzeni* and other insects. A maximum-likelihood phylogeny inferred from 641 unambiguously aligned amino acid sites is shown. Bootstrap probabilities no less than 50% are indicated on each node. In brackets are sequence accession numbers. (C) Relative-rate tests for

comparing the molecular evolutionary rates of amino acid sequences inferred from the soldier-specific and non-specific PO genes of *N. monzeni*.

**Fig. S2.** Gene expression levels in *N. monzeni* and *A. pisum*. (A-R) Gene expression levels in terms of TPM values in *N. monzeni*. Abbreviations: LGC, large globular cell; E, embryo; S, soldier; M, middle-instar insect; A, adult; AC, adult carcass from which ovaries containing embryos were dissected and removed. (A) Soldier-specific PO [LC436906]. (B) PO-NmA [IAEA01000001]. (C) PO-NmB [IAEA01000002]. (D) PO-NmC [IAEA01000003]. (E) PO-NmD [IAEA01000004]. For phylogenetic relationship of the PO genes, see *SI Appendix*, Figure S1B. (F) RCP [LC436900-LC436905]. (G) RCP-S [LC436897-LC436899]. For structural relationship of RCP to RCP-S, see *SI Appendix*, Figure S3A. (H) Fatty acid synthase [IAEA01000005]. (I) Dihydroxyphenylalanine decarboxylase (DDC) [IAEA01000006]. (J) Dopachrome conversion enzyme (DCE) [IAEA01000007]. For metabolic relationship of PO, DDC and DCE in the melanin synthesis pathway, see *SI Appendix*, Figure 4A. (K) Serine protease [IAEA01000008]. (L) Serpin [IAEA01000009]. (M) Phenylalanine-4-monooxygenase [IAEA01000010]. (N) Transaldolase [IAEA01000011]. (O) Phosphoenol-pyruvate carboxykinase (PEPCK) [IAEA01000012]. For metabolic relationship of phenylalanine-4-monooxygenase, transaldolase and PEPCK, see Figure 7B. (P) Transglutaminase-Nm1 [IAEA01000013]. (Q) Transglutaminase-Nm2 [IAEA01000014]. (R) Hemolectin [IAEA01000015]. (S-Y) Gene expression levels in terms of TPM values in *A. pisum*. Abbreviations: HC, hemocyte; FB, fat body; GU, gut; WB, whole body. (S) PO [ACYPI004484]. (T) PO [ACYPI001367]. (U) RCP-like [ACYPI086030]. (V) RCP-like [ACYPI005732]. (W) RCP-like [ACYPI081606]. (X) RCP-like [ACYPI088785]. (Y) RCP-like [ACYPI069330]. Different alphabetical characters (a-d) indicate statistically significant differences (Tukey HSD test:  $P < 0.05$ ).

**Fig. S3.** Genes and proteins of RCP, RCP-S and fatty acid synthase of *N. monzeni*. (A) Structural features of RCP gene (top) and RCP-S gene (bottom). Homologous regions between RCP and RCP-S are indicated by dotted lines. Peptide sequences and regions used for raising antibodies are shown by bars. S and R indicate the N-terminal signal peptide region and the repeat-containing middle region, respectively. R(31-43) means, for example, the repeat region consists of 31-43 consecutive repeat units, each of which is 8 amino acid residues and classified to either of 7 sequence types. For details, see Figure 2F. (B) Southern blotting of RCP gene. (C) MALDI-TOF/MS analysis of RCP proteins in body fluid samples representing the gall colonies a-h (for SDS-PAGE analysis, see Fig. 2D). The number above each peak indicates molecular mass of the protein. (D) SDS-PAGE of soldier's body fluid proteins and immunoblotting against RCP-S. Asterisk indicates a non-specific signal. (E) Attributes and sequence accession numbers for the RCP-S alleles identified from the gall colonies i-m (see Fig. 2E and G) and additional gall colonies n and o. (F) SDS-PAGE of soldier's body fluid

proteins and immunoblotting against the no. 3 band protein identified as a fatty acid synthase. Three gall colonies (p-r) are analyzed. Asterisk indicates a non-specific signal.

**Fig. S4.** Control experimental data for detection and expression of PO and RCP. (A) In situ hybridization of PO gene expression using a sense probe, corresponding to Figure 3A. (B) In situ hybridization of RCP gene expression using a sense probe, corresponding to Figure 3B. (C) Immunohistochemistry of PO using a pre-immune serum, corresponding to Figure 3C. (D) Immunoelectron microscopy of PO using a pre-immune serum, corresponding to Figure 3H. (E) Immunoelectron microscopy of RCP using a pre-immune serum, corresponding to Figure 3I. (F) Activity of recombinant PO analyzed on native PAGE gels. (G) PO activity in soldier's body fluid analyzed on native PAGE gels. (H) Production of recombinant PO analyzed by SDS-PAGE and immunoblotting. (I) Production of recombinant RCP analyzed by SDS-PAGE and immunoblotting.

**Fig. S5.** Lipids in soldier's body fluid of *N. monzeni*. (A, B) Triglycerides in soldier's secretion before and after solidification (black and gray bars), and in the whole body of soldier nymphs (white bars). (A) Composition of major triglycerides. (B) Composition of minor triglycerides. (C) Fatty acid composition generated by alkaline hydrolysis of the secretion. Free fatty acids were excluded from the result. Abbreviations: C6:0, hexanoic acid; C6:2, sorbic acid, C10:0, capric acid; C12:0, lauric acid; C14:0, myristic acid; C16:0, palmitic acid; C18:0, stearic acid.

**Fig. S6.** Comparison of gene expression profiles of LGC with those of other tissues of *N. monzeni* and *A. pisum*. (A) Principal component analysis based on expression levels of 9,825 genes that exhibit 1:1 orthologous relationship between *N. monzeni* and *A. pisum*. Red shows *N. monzeni*: LGC, large globular cell; E, embryo; S, soldier; M, middle-instar insect; A, adult; AC, adult carcass from which ovaries containing embryos were dissected and removed. Blue shows adult *A. pisum*: HC, hemocyte; FB, fat body; GU, gut; WB, whole body. (B) Cluster analysis based on the same data set, in which a dendrogram and a heat map showing relative gene expression levels are depicted.

**Fig. S7.** Expression levels of genes related to tyrosine synthesis in bacteriocytes, LGCs and whole body of *N. monzeni*. (A) Phenylalanine-4-monooxygenase [IAEA01000010]. Note its high and bacteriocyte-specific expression. (B) Aspartate aminotransferase-Nm1 [IAEA01000016]. (C) Aspartate aminotransferase-Nm2 [IAEA01000017]. (D) Aspartate aminotransferase-Nm3 [IAEA01000018]. Note that expression levels of these aspartate transaminase genes are incomparably low in comparison with phenylalanine-4-monooxygenase. (E) Transaldolase [IAEA01000011]. Note its high and preferential expression in bacteriocytes and LGCs. (F) Phosphoenol-pyruvate carboxykinase (PEPCK) [IAEA01000012]. Note its high and preferential expression in LGCs. (G)

Enolase [IAEA01000019]. No preferential expression was observed in bacteriocytes and LGCs. BAC, bacteriocyte; WBA, whole body of adult; LGC, large globular cell; WBS, whole body of soldier. Note that LGCs are specifically found in soldier nymphs. To avoid contamination of LGCs, the bacteriocyte samples were dissected from adult insects. Asterisks indicate statistically significant differences (GLM: \*,  $P < 0.05$ ; \*\*,  $P < 0.01$ ; \*\*\*,  $P < 0.001$ ).

## **SI Movie Legends**

**Movie S1.** Soldier nymphs of *N. monzeni* repairing their gall.

**Movie S2.** A soldier nymph of *N. monzeni* artificially stimulated to discharge body fluid with numerous large globular cells.

**A**

```

1  GTTTGCTCAACCACTGGCAGCTTATTCGAATCGCAATCGTTGCTTGTTCACCATCTGCAGAAACAATAGGCTTCGCGATGTCAAAATATCGGCAAAATTTTGATTGTTCTATCGTCCC 120
121 CATGAACCCATATACATGGTAAAGGGGAAAAATAACGTTTCATTTGGCATCCCAAGAGTTACGTTTGGTCGAGAAATTTATCGTTACATACAATTCAAAGTCCAAACCACTGGAGAA 240
15  HEEPIYTMGKGEENNVHFGIPIPKSVAACMVROQNLSSLHHTILKKSQT TGE 54
241 AAAITTCAGTGTGCTTTGGACCTCTPDLSTGTGICATAGAAGATGACGGACGATACACTTTTCGACITTCAGTCCCAAATCCAGTACAATAGCCGGCAAACTAATT 360
55  KFPFNVAKLDPLDPLSFLIQAGEMTFSDRSTFSSGDFSKSSTIAAGKLI 94
361 ACAATGTTTGAATCGAAAAGTCTGACGAATTTGTGCTGTGGCCGGTACTGTCGGCAGAAATAACAGCACATGTTTTCTATCGGTTGCGTGGCTATTTACATCGGCC 480
95  TFMFNNAKDAAGDEFFVSLAAYVYCRNINNKHLMFTFFYVAVLHHRP 134
481 GATTGCAGAGGTTTGAAGCTGCCACTCTAATGCAGAAATATTTCCGTCGCTGACATGACTGTTCGGTTATCAATCGAGCGAAGAAAAGCAGCTTTGGCCGATGATTCTAAAGAGCCT 600
135 DCRKILKLPSSNAEIFFPSSLRMABNRARLAEAPALADDDSSK 174
601 GTTAAATACCTCAGAACCTTCGTCGACCAATTTGAAAGCCGAGATAAAGTCGCTTATTTCCGGAAACATCAGCTTAACTTGCACCACATTCATTGGCATTGTTGTTATCGCTC 720
175 VEEIYVLSNYSNKAELIIFKLSIKKLNKALNKLAKYVITKKNVEVLTDSNRQTLKPKPNSGMDIIFAE 214
721 ACAGGTCGATGGAAATCGTTAAGAAAGATCGAGCGTATTATTTATTATGATCAACAAATAGTTGCCAGATACAACACTTCCAGACGGTTAAGTAAACGGACTCAACAGAGTAGTT 840
215 TGPMEIEIVKKNKDERRGTELELVYMHQQTAMIAARYNLHNSNLNGLNRV 254
841 CCTGTGCACACTTAAGGATCGATCCGATCCGATTTTTCGAAAGTTAGCTAGGCGCACTAAACGCGCTACCGCTCGAGATTCGECACATGATAAGCAACGTCAAGAGG 960
255 PVDAYVKN DVTGATCCGATCCGATTTTTCGAAAGTTAGCTAGGCGCACTAAACGCGCTACCGCTCGAGATTCGECACATGATAAGCAACGTCAAGAGG 960
961 AAAGACCGTACGTAATTCGGAACATCGAAATCGTGGCAAAATCGTATATTCGAAAGCCATACACACCGGATACACCGGATACACACCGGATACACACCGGATACACACCGGATAC 1080
295 KDAVYNIGKLLKIWRNIFEAALHITKQIPLQPDGNGNRIRIKLLGAVPE 334
1091 AAGGASATCCGAAACCGTATAGATATGCTGGGAAACATGATTTAGTCGTTGTGTAAGCGTGAACCAAAATTTACGGCAGTTTTCACAAATTCGGGACACATATTATGCTCAT 1200
335 KGDTEVNGIIGDMLGNMISVLSVIRNLSKQVAVLQVAVLQVAVLQVAVLQVAVLQVAVLQVAVLQVAVLQVAVLQVAVLQVAVLQVAVLQVAVLQVAVLQVAVLQVAVL 1200
1201 ATTCACACCGTATCAGAGATCTGSAACAGGAGGGGTTTCCGAATAAACGCCATCCGCTGATCGAGTTTTCACGGTGGCAGCGCATATCGACGATATGTTTACGAA 1320
375 IHDPPDHRRYLDLETAACAGGAGGGGTTTCCGAATAAACGCCATCCGCTGATCGAGTTTTCACGGTGGCAGCGCATATCGACGATATGTTTACGAA 1320
1321 TTTAAACGCAACATCTGGTTCAGATCCGACGATTTGGGCTTCCGAAGCATCGTAAATAAAGAGTTTAAAGTATTTGACTGATAACCAACACTTAAACCTAATGGTAATGCGAAT 1440
415 FKRNIIPGDTDDDLGFFPKLIVITKKNVEVLTDSNRQTLKPKPNSGMDIIFAE 454
1441 TCCCGTITWCGAAAGAGTAAGATGGATTTGGGAGGTTTGGTATTTGCACAAATCCGGTTCGGTAATGGTACAATACACCCATTTACAGTATTTTCATTTAAATACATTTTAA 1560
455 STFWGQKIKSNDVSSGLDFFAQS GSVVMVMSVMSVMSVMSVMSVMSVMSVMSVMSVMSVMSVMSVMSVMSVMSVMSVMSVMSVMSVMSVMSVMSVMSVMSVMSVMSVMSVMSV 494
1561 ATAACAATATTCGAAGAAATCGAAAAGGTAACCTTCGTATATTTAGCACCAAAATATGGCGAAGACGGTACTCAGTTTACTTAATGAACAAGACGCTTTTTTAACTC 1680
495 IANNNFVGNRKRKGTIRIFLAKPKKGLKQALVLR LFI 534
1681 GACAATTTACTAAACACTCAACCCGGTGAATATCATTTGATCGAAATCGTGAATCGCGGTTGACTTAAATACGATTCCTGCTCGGTTTGGAAAATCAACAATTTAACT 1800
535 DKFTTACTAAACACTCAACCCGGTGAATATCATTTGATCGAAATCGTGAATCGCGGTTGACTTAAATACGATTCCTGCTCGGTTTGGAAAATCAACAATTTAACT 1800
1801 CCTAATGAAGAAGAGAGGATTTGTAAGTGTGTTGGCCGCAACATATGCTGATACCTAAAGGGTCGGCAGAGGTTCTACGTTTATTCGTCATAGGTTGTGAGAGTGCAGAAAGAT 1920
575 ANEEEDDKCKGWPQHMLTIPKGGTAATSAATGATCCGGATCGCCGGGCCATGGGCTATCGTTCSACAGACCATGGATAGTA 2040
1921 CATGTTGAATCAAGAAACAAATTTGAAAAAGATGCTCCAGTATTGTGGCATAATSAATGATCCGGATCGCCGGGCCATGGGCTATCGTTCSACAGACCATGGATAGTA 2040
615 HVEYKAKHKCKKDAASVYCGVINEMVYFRARMFRD RPPWIV 654
2041 AAAGATTTTATTCGGTGCAGATAAAGATTCGAATGTTGTCTGCTCGGTTTATACGGTTTAGTGAGGAAAACAATTTGTTTAAAAAGTACACCTTGAAGACCGGATGG 2160
655 KDFILGKCMNSVVFVAQPVVTVITACGGTTTAGTGAGGAAAACAATTTGTTTAAAAAGTACACCTTGAAGACCGGATGG 2160
2161 AGCACATTTGTTGAAAAGGAAATAATAATAAATAATAGGATAAGAAACCCCAATACGAGTATGCTCCCATCACATTTTATTAAGTATAGTAGTATTTAGATAGTATTTAGA 2280
2281 ATTTATTAATAATATTACTTTATATACATAATAATTTGGCATTTGAAAATC(G)H 2335

```

**B**

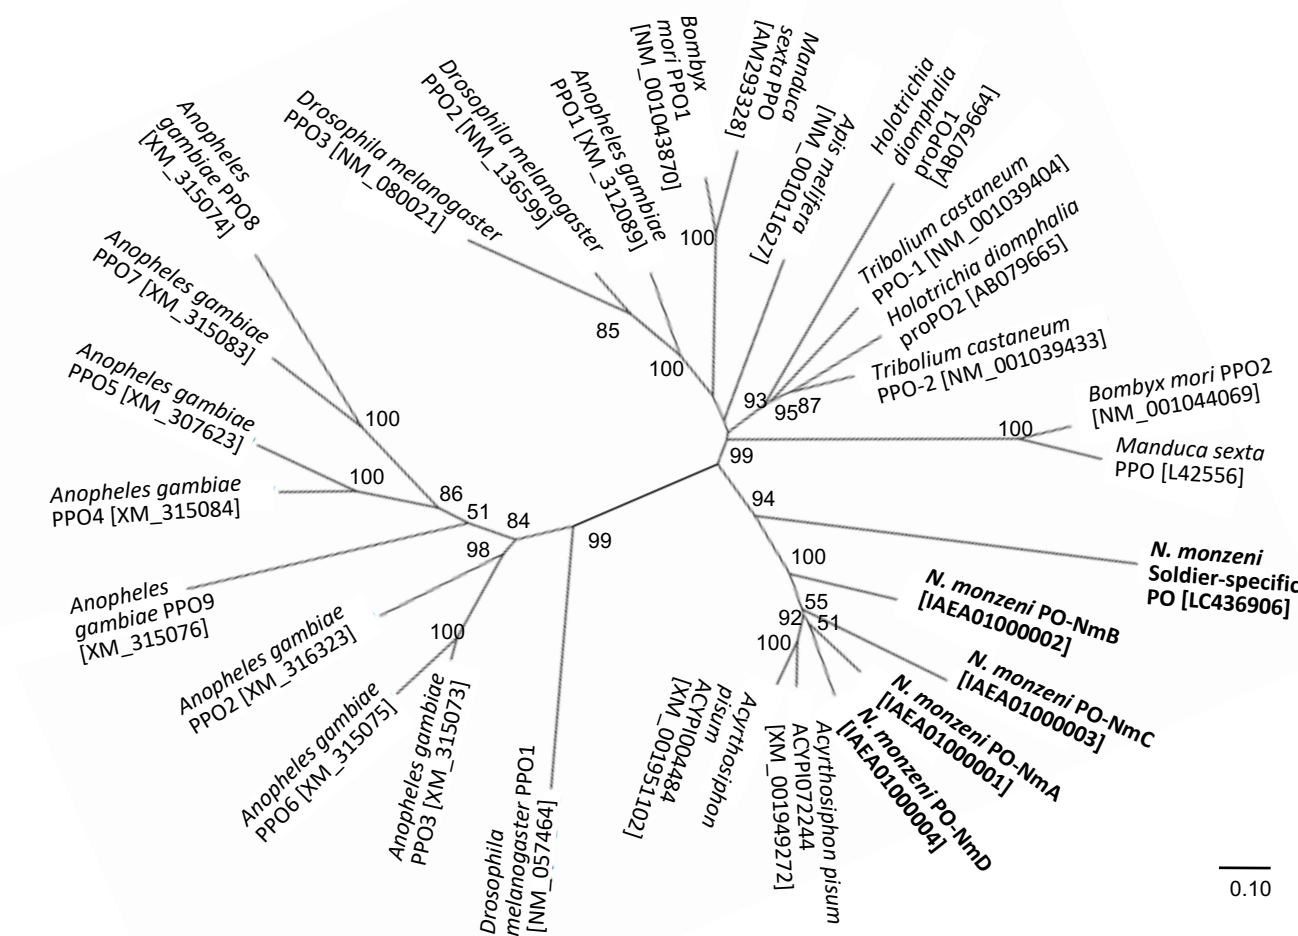

**C**

| Lineage 1                      | Lineage 2             | Outgroup <sup>a</sup>                            | K1 <sup>b</sup> | K2 <sup>c</sup> | K1-K2 | K1/K2 | P-value <sup>d</sup>   |
|--------------------------------|-----------------------|--------------------------------------------------|-----------------|-----------------|-------|-------|------------------------|
| Soldier-specific PO [LC436906] | PO-NmA [IAEA01000001] | POs of bean bug [BAN20821] & whitefly [AYA71581] | 0.449           | 0.200           | 0.249 | 2.25  | 1.2 x 10 <sup>-7</sup> |
| Soldier-specific PO [LC436906] | PO-NmB [IAEA01000002] | POs of bean bug [BAN20821] & whitefly [AYA71581] | 0.437           | 0.218           | 0.219 | 2.00  | 1.3 x 10 <sup>-7</sup> |
| Soldier-specific PO [LC436906] | PO-NmC [IAEA01000003] | POs of bean bug [BAN20821] & whitefly [AYA71581] | 0.455           | 0.299           | 0.156 | 1.52  | 0.00029                |
| Soldier-specific PO [LC436906] | PO-NmD [IAEA01000004] | POs of bean bug [BAN20821] & whitefly [AYA71581] | 0.453           | 0.211           | 0.242 | 2.15  | 1.0 x 10 <sup>-7</sup> |

<sup>a</sup> Bean bug *Riptortus pedestris* and whitefly *Dialeurodes citri*.

<sup>b</sup> Estimated mean distance between lineage 1 and the last common ancestor of lineages 1 and 2.

<sup>c</sup> Estimated mean distance between lineage 2 and the last common ancestor of lineages 1 and 2.

<sup>d</sup> P-value was generated using the program RRTree (Robinson-Rechavi and Huchon, 2000).

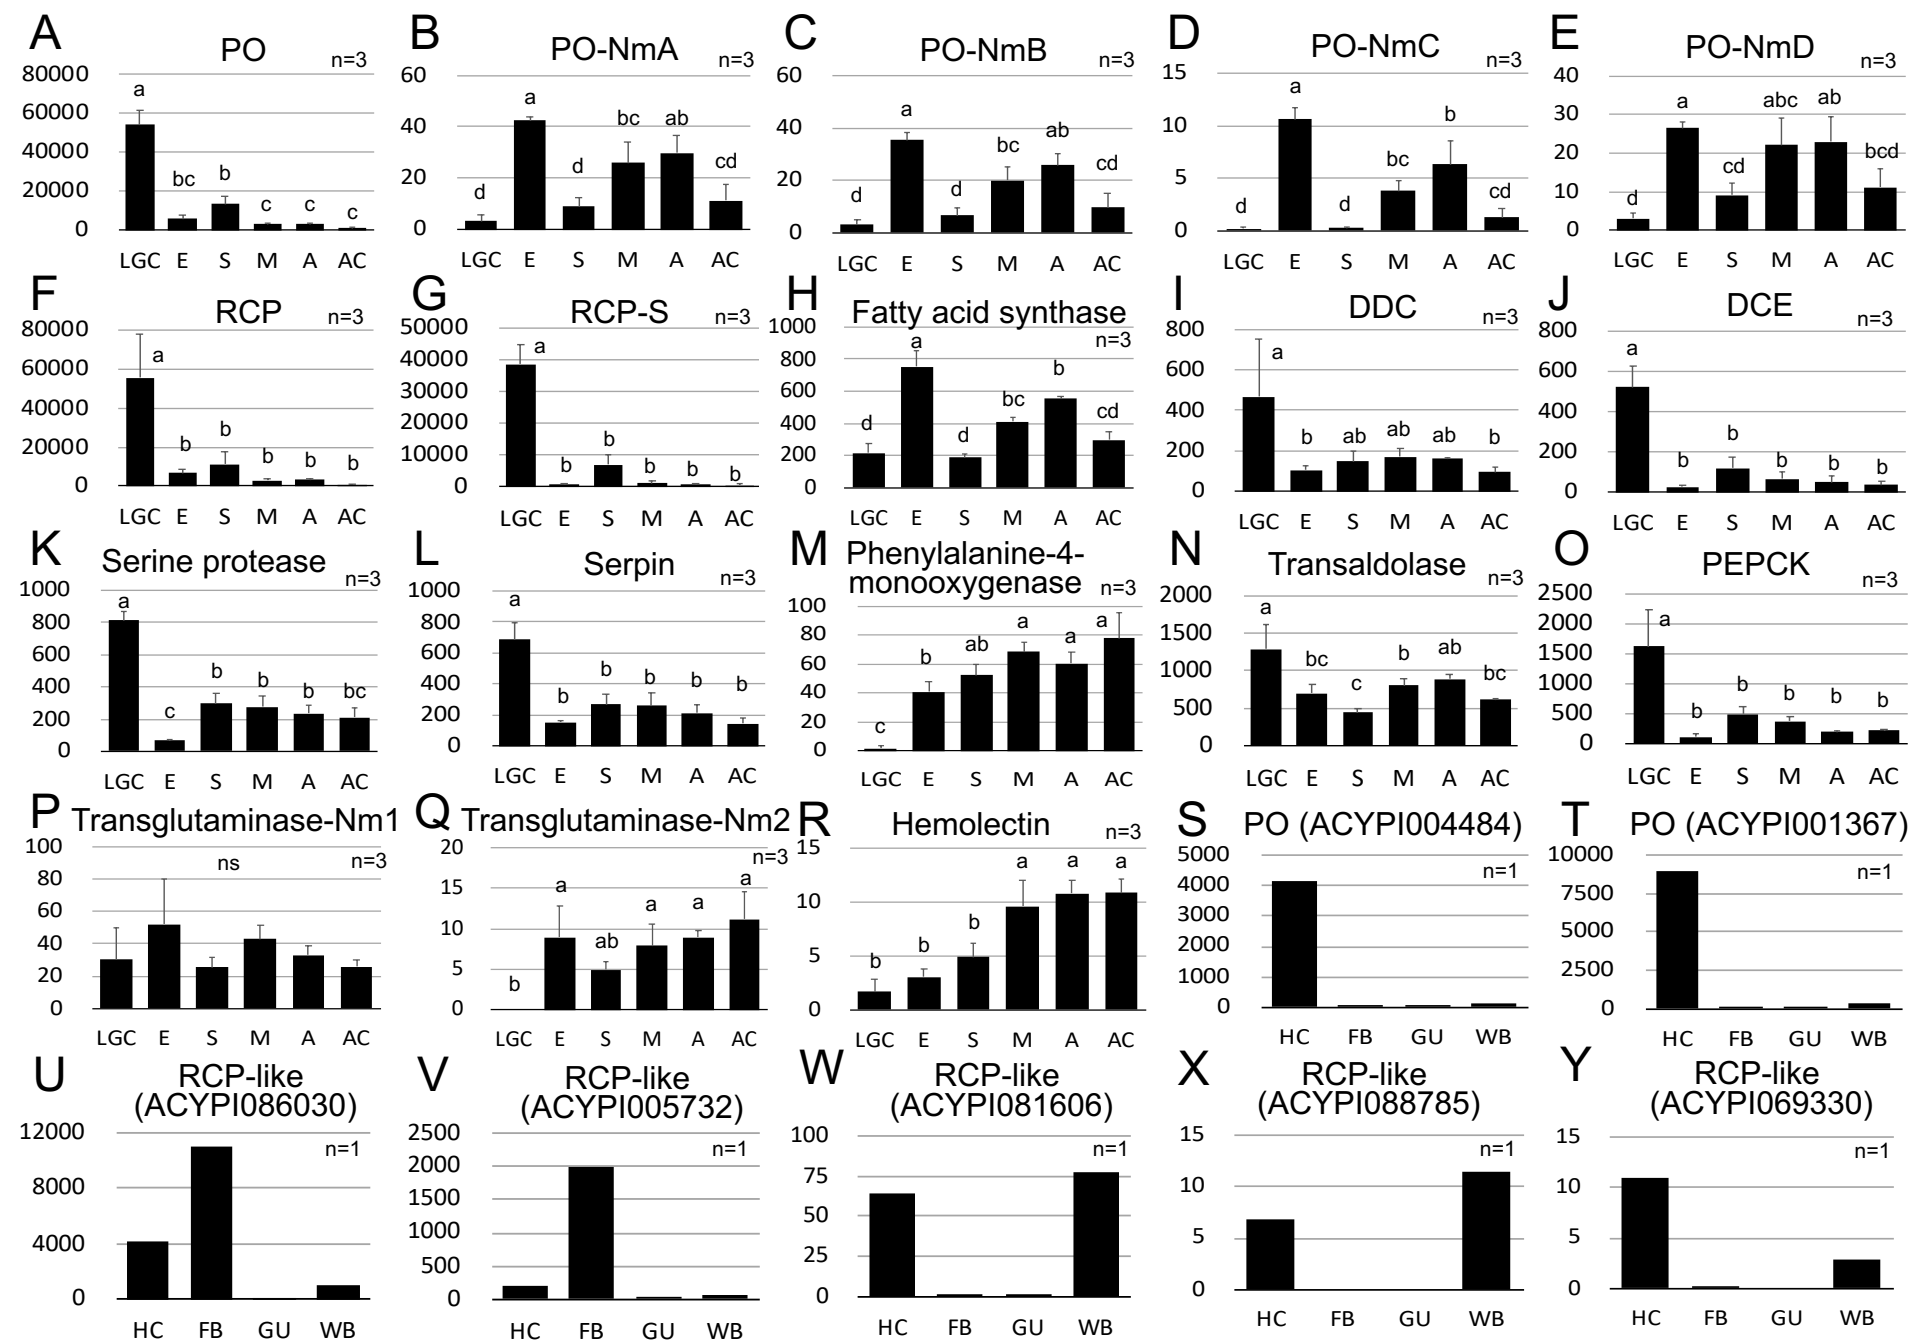



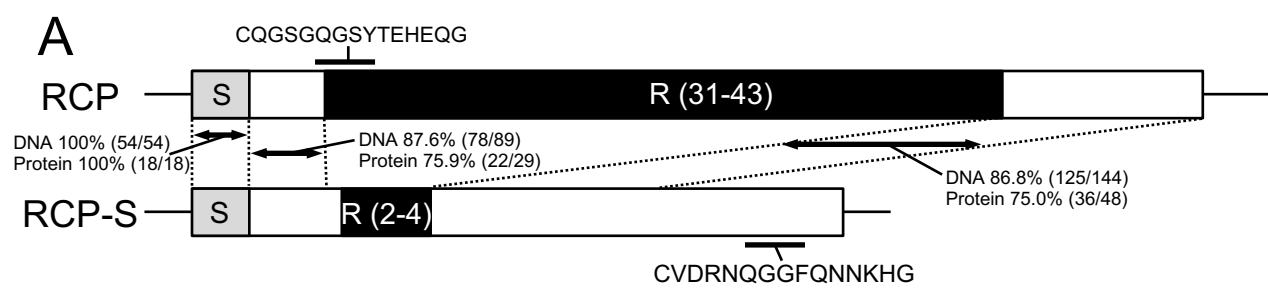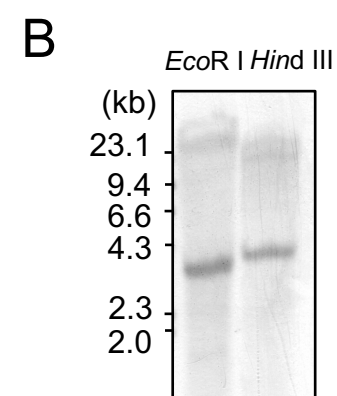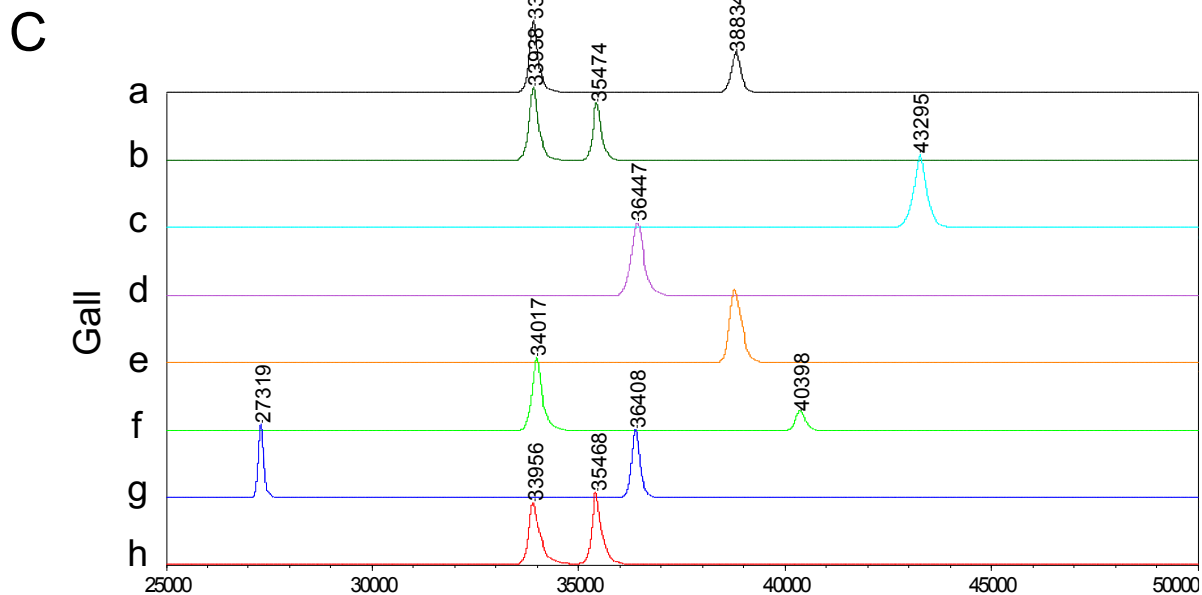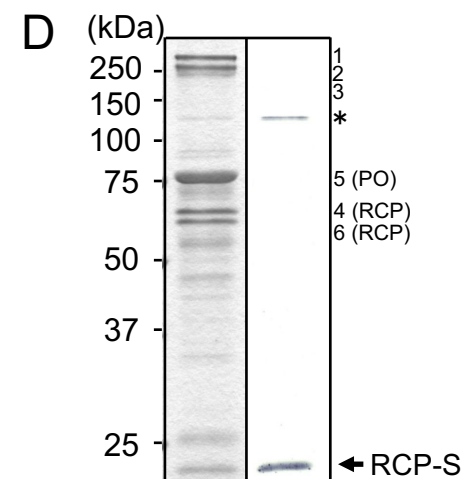

**E**

| Galls               | No. of repeats | Amino acids | Size (kDa) | Accession no. |
|---------------------|----------------|-------------|------------|---------------|
| l, m                | 2              | 217         | 21.0       | LC436897      |
| l, j, k, l, m, n, o | 3              | 225         | 21.7       | LC436898      |
| o                   | 4              | 233         | 22.4       | LC436899      |

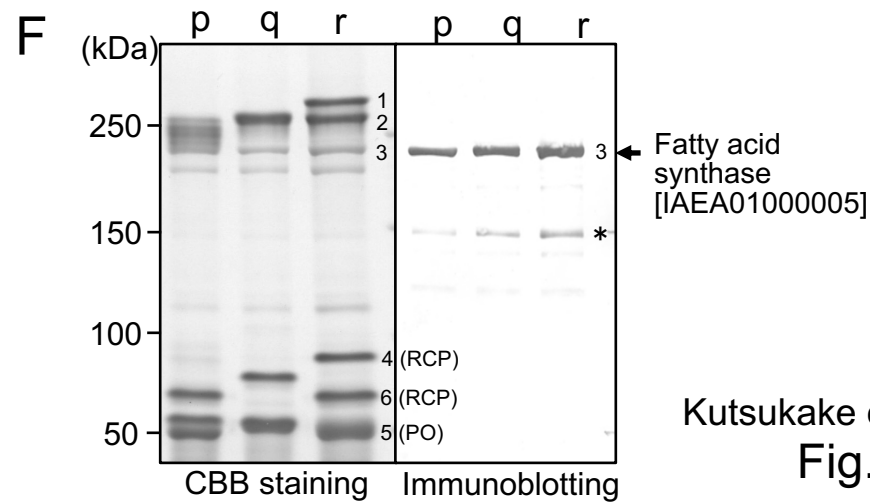

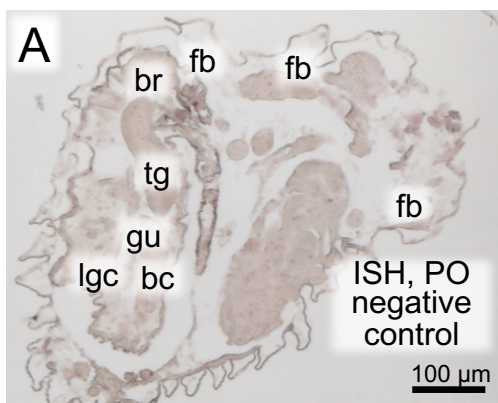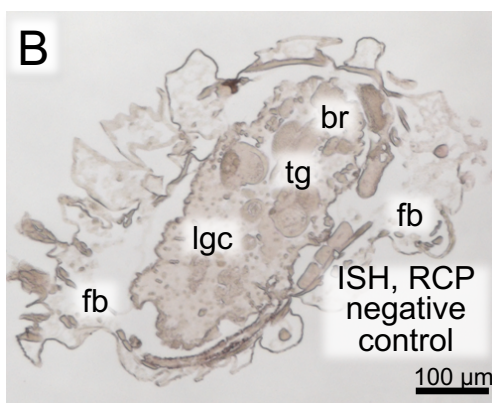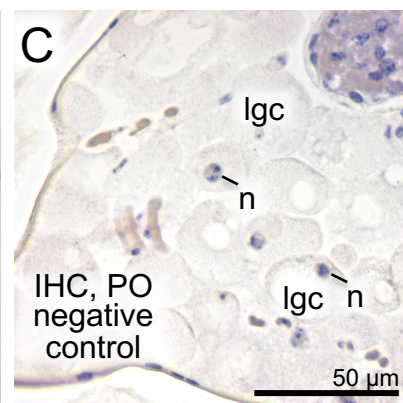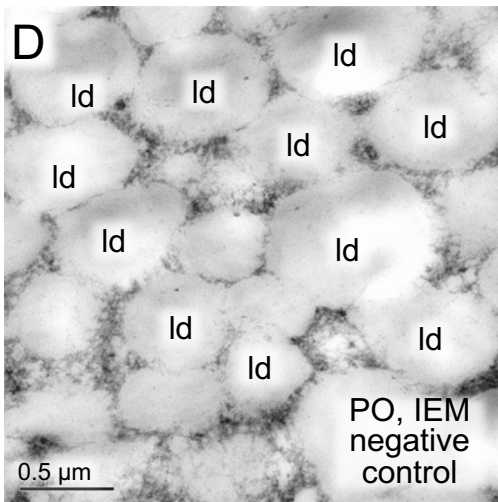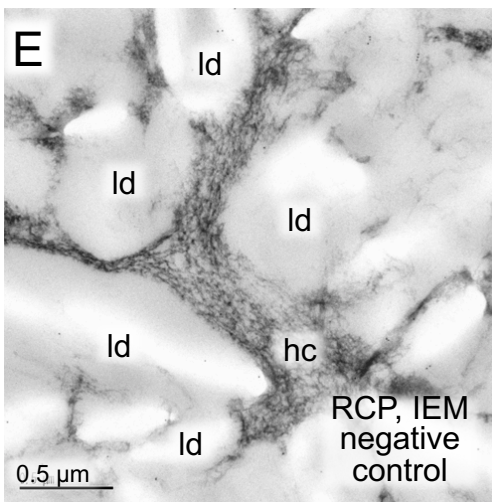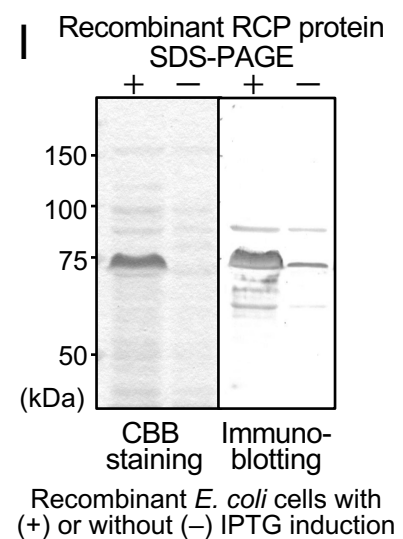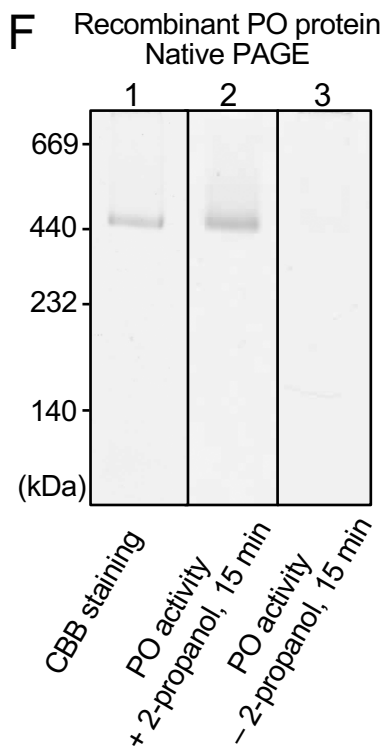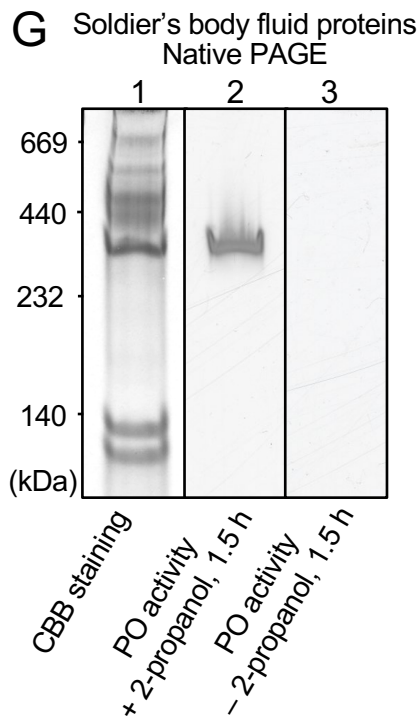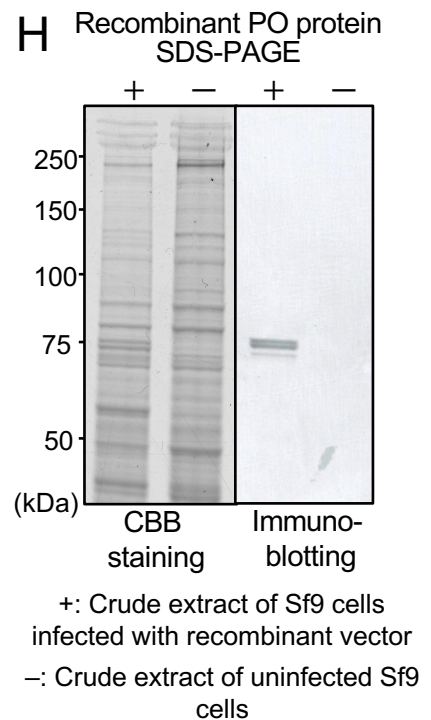

**A** Major lipid components (mean  $\pm$  SD, n=5)

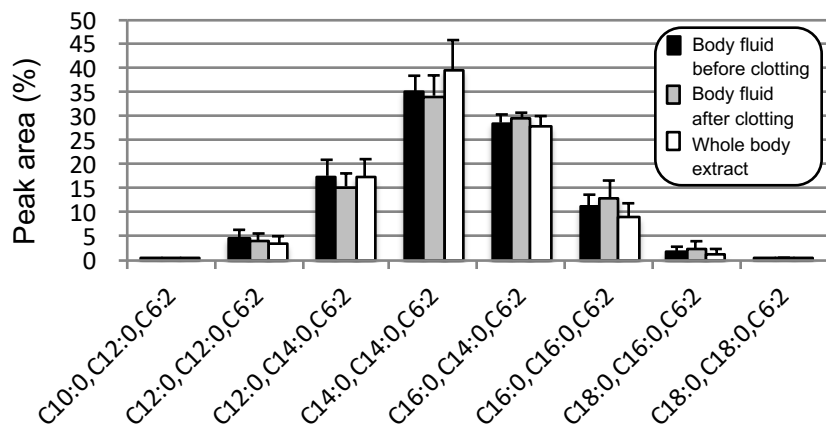

**B** Minor lipid components (n=5)

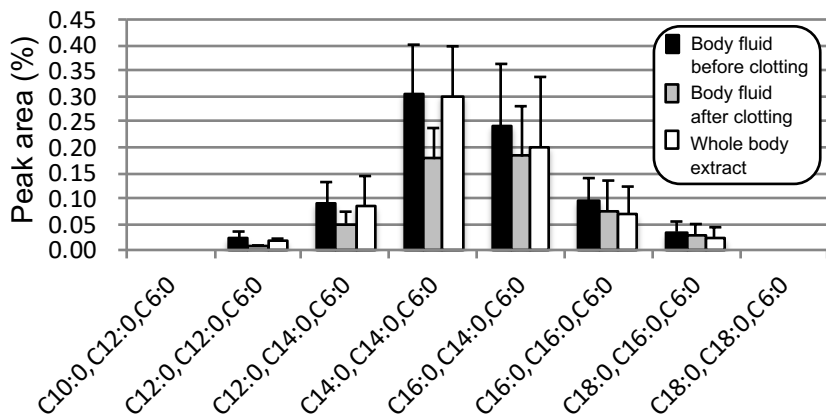

**C** Fatty acids after hydrolysis (n=7)

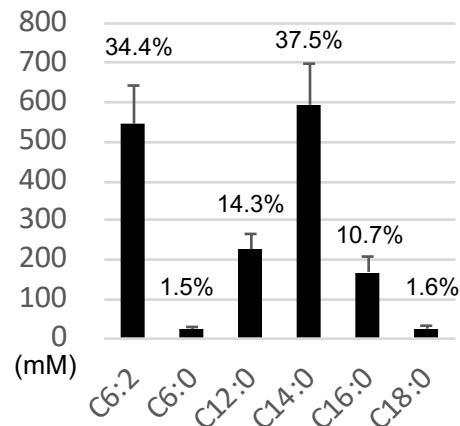

A

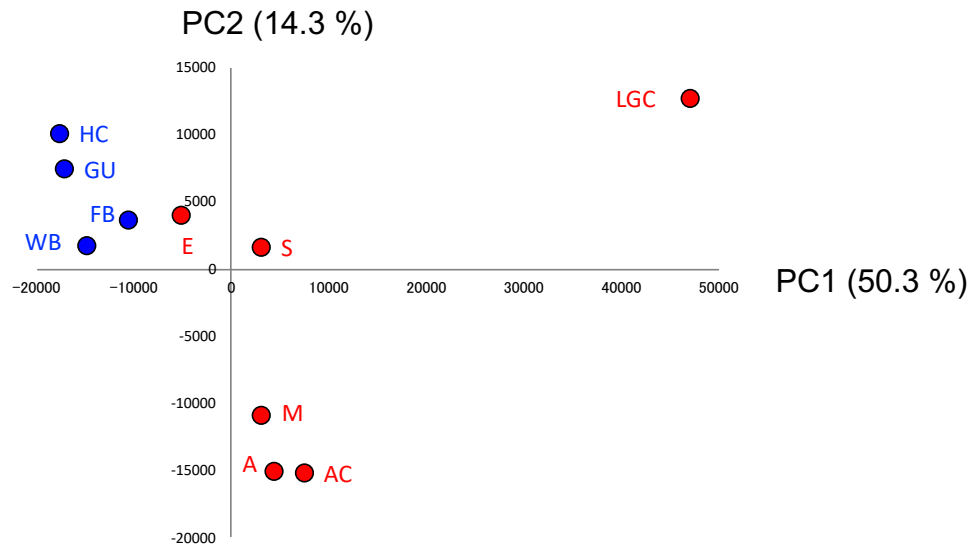

B

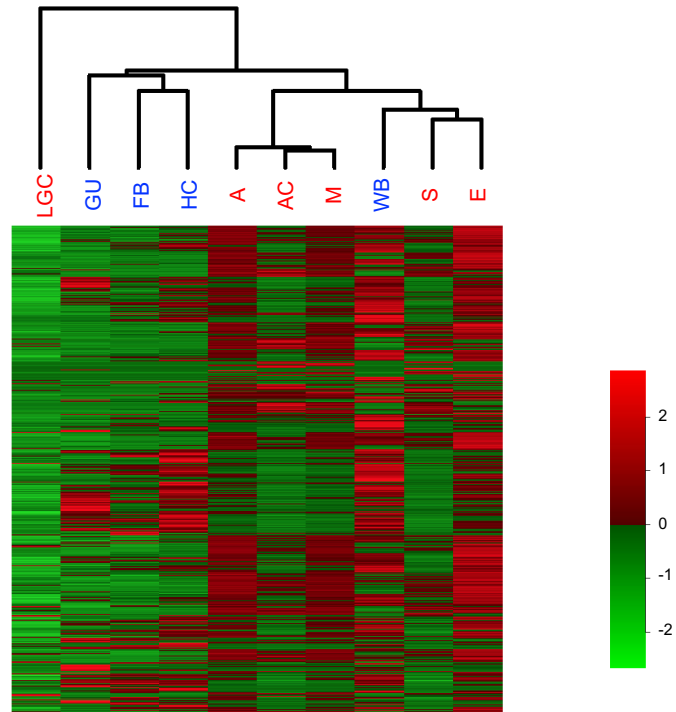

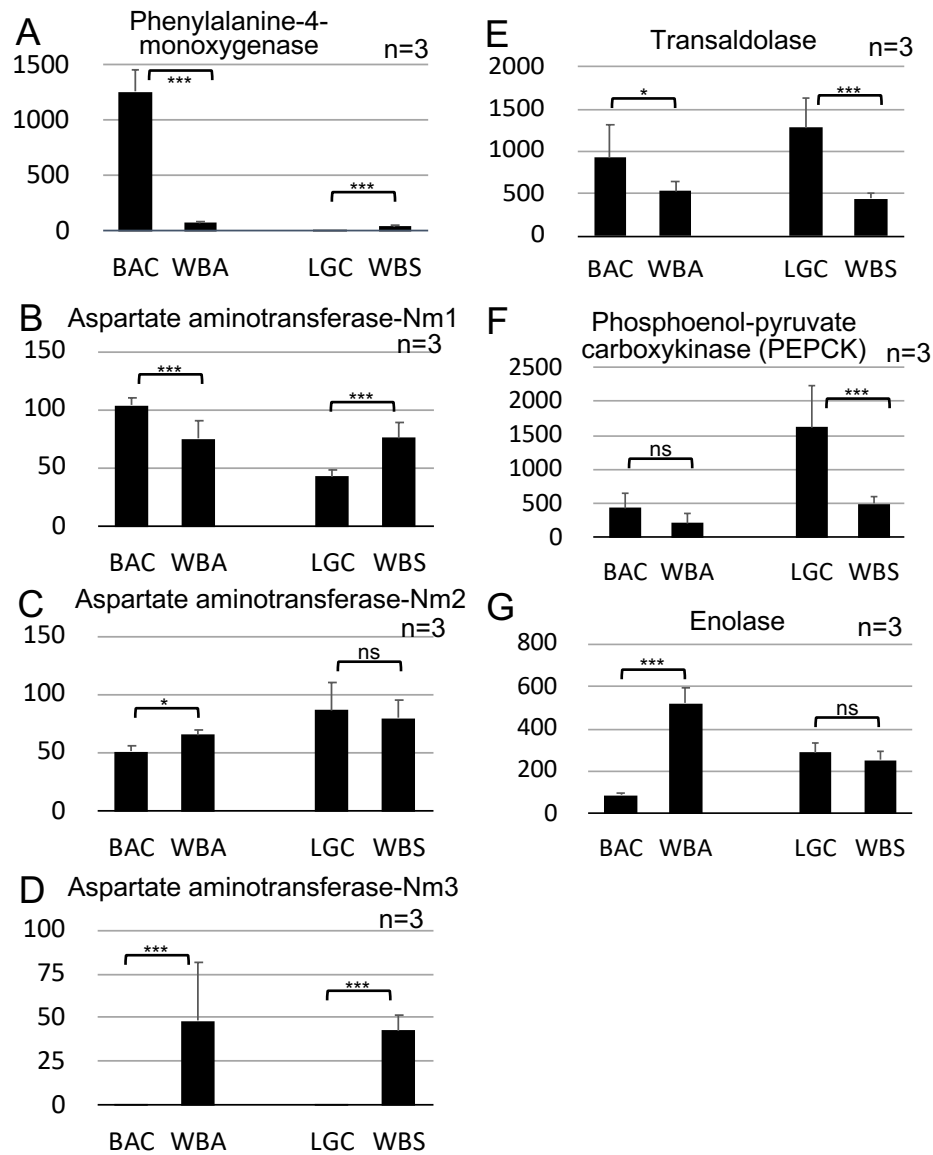

**Table S1.** RNA-seq data summary.

| Sample                                          | Locality and collection date               | Stage/morph, tissue                                              | Number of pairs/reads | HiSeq        | Accession number |
|-------------------------------------------------|--------------------------------------------|------------------------------------------------------------------|-----------------------|--------------|------------------|
| <i>N. monzeni</i> replicate 1                   | Shinkiba, Tokyo, Japan<br>16 May 2012      | 1 <sup>st</sup> instar soldier nymphs, LGCs                      | 29,202,505            | 100bp paired | DRA007668        |
|                                                 |                                            | Embryos, whole body                                              | 41,666,434            | 100bp paired | DRA007672        |
|                                                 |                                            | 1 <sup>st</sup> instar soldier nymphs, whole body                | 30,624,551            | 100bp paired | DRA007669        |
|                                                 |                                            | Middle instar aphids, whole body                                 | 27,668,289            | 100bp paired | DRA007670        |
|                                                 |                                            | Adults, whole body                                               | 28,016,416            | 100bp paired | DRA007671        |
|                                                 |                                            | Adults, carcass without ovaries and embryos                      | 40,155,928            | 100bp paired | DRA007673        |
| <i>N. monzeni</i> replicate 2                   | Shinkiba, Tokyo, Japan<br>16 May 2012      | 1 <sup>st</sup> instar soldier nymphs, LGCs                      | 6,958,119             | 100bp paired | DRA007674        |
|                                                 |                                            | Embryos, whole body                                              | 8,097,348             | 100bp paired | DRA007678        |
|                                                 |                                            | 1 <sup>st</sup> instar soldier nymphs, whole body                | 7,710,432             | 100bp paired | DRA007675        |
|                                                 |                                            | Middle instar aphids, whole body                                 | 8,657,918             | 100bp paired | DRA007676        |
|                                                 |                                            | Adults, whole body                                               | 8,457,851             | 100bp paired | DRA007677        |
|                                                 |                                            | Adults, carcass without ovaries and embryos                      | 7,729,867             | 100bp paired | DRA007679        |
| <i>N. monzeni</i> replicate 3                   | Shinkiba, Tokyo, Japan<br>16 May 2012      | 1 <sup>st</sup> instar soldier nymphs, LGCs                      | 8,271,511             | 100bp paired | DRA007680        |
|                                                 |                                            | Embryos, whole body                                              | 8,273,314             | 100bp paired | DRA007684        |
|                                                 |                                            | 1 <sup>st</sup> instar soldier nymphs, whole body                | 8,236,393             | 100bp paired | DRA007681        |
|                                                 |                                            | Middle instar aphids, whole body                                 | 7,087,768             | 100bp paired | DRA007682        |
|                                                 |                                            | Adults, whole body                                               | 8,400,338             | 100bp paired | DRA007683        |
|                                                 |                                            | Adults, carcass without ovaries and embryos                      | 7,380,855             | 100bp paired | DRA007685        |
| <i>N. monzeni</i> bacteriocytes, polyA selected | Shinkiba, Tokyo, Japan<br>7 May 2018       | Adults, bacteriocytes replicate 1                                | 13,050,748            | 150bp paired | DRA007686        |
|                                                 |                                            | Adults, bacteriocytes replicate 2                                | 6,075,936             | 150bp paired | DRA007688        |
|                                                 |                                            | Adults, bacteriocytes replicate 3                                | 7,206,319             | 150bp paired | DRA007690        |
|                                                 |                                            | Adults, whole body replicate 1                                   | 7,668,216             | 150bp paired | DRA007687        |
|                                                 |                                            | Adults, whole body replicate 2                                   | 8,349,565             | 150bp paired | DRA007689        |
|                                                 |                                            | Adults, whole body replicate 3                                   | 7,850,483             | 150bp paired | DRA007691        |
| <i>N. monzeni</i> bacteriocytes, rRNA removed   | Shinkiba, Tokyo, Japan<br>19 & 27 May 2015 | 1 <sup>st</sup> instar soldier nymphs, bacteriocytes replicate 1 | 18,489,980            | 66bp single  | DRA007692        |
|                                                 |                                            | 1 <sup>st</sup> instar soldier nymphs, bacteriocytes replicate 2 | 25,938,326            | 66bp single  | DRA007693        |
|                                                 |                                            | 1 <sup>st</sup> instar soldier nymphs, bacteriocytes replicate 3 | 21,243,725            | 66bp single  | DRA007694        |
| <i>Acyrtosiphon pisum</i> laboratory strain ApL | Sapporo, Hokkaido, Japan                   | Adults, hemocytes                                                | 29,652,916            | 100bp paired | DRA007695        |
|                                                 |                                            | Adults, fat body cells                                           | 27,522,381            | 100bp paired | DRA007696        |
|                                                 |                                            | Adults, gut                                                      | 21,76,1730            | 100bp paired | DRA007697        |
|                                                 |                                            | Adults, whole body                                               | 23,62,4012            | 100bp paired | DRA007698        |

**Table S2.** LGC-dominant genes identified by RNA-seq analysis.

|    | Genes (species) <sup>a</sup>                                                        | E-value   | TPM (mean, n = 3) |      |       |       |       |       | Ratio (LGC/S) |
|----|-------------------------------------------------------------------------------------|-----------|-------------------|------|-------|-------|-------|-------|---------------|
|    |                                                                                     |           | LGC               | E    | S     | M     | A     | AC    |               |
| 1  | unknown                                                                             |           | 142222            | 4236 | 22327 | 20402 | 24746 | 18888 | 6.4           |
| 2  | unknown                                                                             |           | 57625             | 1861 | 11548 | 1992  | 1824  | 1105  | 5.0           |
| 3  | <b>RCP</b>                                                                          |           | 55475             | 6681 | 11104 | 2927  | 3192  | 578   | 5.0           |
| 4  | <b>Phenoloxidase (<i>Drosophila melanogaster</i>)</b>                               | 0         | 54357             | 5751 | 13628 | 3230  | 3237  | 897   | 4.0           |
| 5  | Lipid storage droplets surface-binding protein 1 ( <i>Drosophila melanogaster</i> ) | 6.0.E-41  | 46538             | 3510 | 10351 | 3105  | 2910  | 1259  | 4.5           |
| 6  | <b>RCP-S</b>                                                                        |           | 38690             | 673  | 6932  | 1200  | 741   | 502   | 5.6           |
| 7  | Lipid storage droplets surface-binding protein 2 ( <i>Drosophila melanogaster</i> ) | 4.0.E-17  | 23537             | 1739 | 4961  | 1653  | 1427  | 627   | 4.7           |
| 8  | unknown                                                                             |           | 20347             | 1078 | 5012  | 1704  | 1276  | 893   | 4.1           |
| 9  | Lipase ( <i>Xenopus laevis</i> )                                                    | 1.0.E-37  | 13842             | 1376 | 3279  | 887   | 760   | 248   | 4.2           |
| 10 | unknown                                                                             |           | 9879              | 496  | 1663  | 508   | 490   | 364   | 5.9           |
| 11 | unknown                                                                             |           | 8387              | 436  | 2064  | 883   | 742   | 507   | 4.1           |
| 12 | unknown                                                                             |           | 7540              | 328  | 1556  | 675   | 670   | 557   | 4.8           |
| 13 | Esterase FE4 ( <i>Myzus persicae</i> )                                              | 1.0.E-55  | 5236              | 156  | 1112  | 329   | 330   | 232   | 4.7           |
| 14 | Dehydrogenase/reductase ( <i>Mus musculus</i> )                                     | 2.0.E-51  | 5087              | 128  | 1264  | 463   | 326   | 324   | 4.0           |
| 15 | <b>Chitinase (<i>Bombyx mori</i>)</b>                                               | 7.0.E-118 | 4835              | 1096 | 1427  | 1295  | 1202  | 826   | 3.4           |
| 16 | Kunitz-type proteinase inhibitor ( <i>Anemonia sulcata</i> )                        | 1.0.E-12  | 4618              | 393  | 885   | 767   | 895   | 571   | 5.2           |
| 17 | Uncharacterized protein ( <i>Plasmodium falciparum</i> )                            | 1.0.E-10  | 4007              | 1557 | 1081  | 1932  | 1847  | 1065  | 3.7           |
| 18 | unknown                                                                             |           | 3431              | 917  | 880   | 658   | 876   | 398   | 3.9           |
| 19 | unknown                                                                             |           | 2936              | 60   | 565   | 33    | 38    | 11    | 5.2           |
| 20 | Carboxylesterase ( <i>Mesocricetus auratus</i> )                                    | 2.0.E-23  | 2770              | 92   | 599   | 192   | 183   | 133   | 4.6           |
| 21 | Malate dehydrogenase ( <i>Caenorhabditis elegans</i> )                              | 3.0.E-54  | 2574              | 796  | 1175  | 999   | 964   | 809   | 2.2           |
| 22 | Golgi-associated plant pathogenesis-related protein ( <i>Homo sapiens</i> )         | 1.0.E-23  | 2382              | 420  | 441   | 225   | 303   | 111   | 5.4           |
| 23 | Megourin ( <i>Megoura viciae</i> )                                                  | 8.0.E-14  | 2243              | 77   | 454   | 64    | 63    | 29    | 4.9           |
| 24 | unknown                                                                             |           | 2207              | 136  | 527   | 373   | 361   | 310   | 4.2           |
| 25 | Malate dehydrogenase ( <i>Bos taurus</i> )                                          | 8.0.E-75  | 1940              | 606  | 872   | 681   | 729   | 631   | 2.2           |
| 26 | <b>1,4-alpha-glucan-branching enzyme (<i>Mus musculus</i>)</b>                      | 0.0.E+00  | 1921              | 757  | 623   | 865   | 904   | 482   | 3.1           |
| 27 | unknown                                                                             |           | 1906              | 428  | 583   | 659   | 562   | 325   | 3.3           |
| 28 | Gelsolin ( <i>Drosophila melanogaster</i> )                                         | 1.0.E-69  | 1836              | 366  | 786   | 725   | 684   | 609   | 2.3           |
| 29 | Lipase ( <i>Homo sapiens</i> )                                                      | 7.0.E-64  | 1783              | 158  | 534   | 171   | 180   | 136   | 3.3           |
| 30 | Gelsolin ( <i>Drosophila melanogaster</i> )                                         | 2.0.E-133 | 1742              | 38   | 406   | 241   | 189   | 137   | 4.3           |
| 31 | Glutamine synthetase ( <i>Drosophila melanogaster</i> )                             | 0         | 1727              | 830  | 836   | 858   | 811   | 790   | 2.1           |
| 32 | unknown                                                                             |           | 1707              | 25   | 697   | 429   | 370   | 438   | 2.5           |
| 33 | <b>Phosphoenolpyruvate carboxykinase (<i>Drosophila melanogaster</i>)</b>           | 0         | 1626              | 101  | 493   | 371   | 187   | 208   | 3.3           |
| 34 | SPARC ( <i>Caenorhabditis elegans</i> )                                             | 7.0.E-63  | 1561              | 371  | 518   | 404   | 439   | 261   | 3.0           |
| 35 | Gelsolin ( <i>Drosophila melanogaster</i> )                                         | 9.0.E-54  | 1441              | 291  | 571   | 601   | 499   | 497   | 2.5           |
| 36 | Dehydrolipichyl diphosphate synthase ( <i>Homo sapiens</i> )                        | 3.0.E-104 | 1370              | 184  | 351   | 261   | 313   | 214   | 3.9           |
| 37 | Cathepsin B ( <i>Bos taurus</i> )                                                   | 2.0.E-147 | 1245              | 390  | 405   | 472   | 490   | 317   | 3.1           |
| 38 | unknown                                                                             |           | 1216              | 444  | 374   | 570   | 526   | 291   | 3.3           |
| 39 | unknown                                                                             |           | 1204              | 288  | 401   | 325   | 331   | 197   | 3.0           |
| 40 | Ornithine decarboxylase ( <i>Rattus norvegicus</i> )                                | 2.0.E-112 | 1160              | 440  | 547   | 517   | 530   | 443   | 2.1           |
| 41 | Androgen-induced gene ( <i>Homo sapiens</i> )                                       | 4.0.E-41  | 1075              | 288  | 240   | 144   | 188   | 62    | 4.5           |
| 42 | unknown                                                                             |           | 986               | 262  | 295   | 440   | 470   | 297   | 3.3           |
| 43 | FAD-dependent oxidoreductase domain-containing protein ( <i>Xenopus laevis</i> )    | 8.0.E-117 | 945               | 111  | 259   | 218   | 190   | 128   | 3.6           |
| 44 | <b>2-acylglycerol O-acyltransferase (<i>Mus musculus</i>)</b>                       | 2.0.E-89  | 940               | 316  | 263   | 319   | 292   | 155   | 3.6           |
| 45 | unknown                                                                             |           | 939               | 66   | 241   | 144   | 115   | 79    | 3.9           |

|    |                                                                                       |           |     |     |     |     |     |     |     |
|----|---------------------------------------------------------------------------------------|-----------|-----|-----|-----|-----|-----|-----|-----|
| 46 | Myrosinase ( <i>Brevicoryne brassicae</i> )                                           | 1.0.E-81  | 913 | 117 | 226 | 67  | 73  | 11  | 4.0 |
| 47 | unknown                                                                               |           | 901 | 116 | 167 | 176 | 143 | 88  | 5.4 |
| 48 | unknown                                                                               |           | 859 | 180 | 217 | 225 | 212 | 119 | 4.0 |
| 49 | unknown                                                                               |           | 827 | 226 | 250 | 253 | 248 | 124 | 3.3 |
| 50 | unknown                                                                               |           | 821 | 21  | 230 | 127 | 89  | 77  | 3.6 |
| 51 | Serine protease<br>( <i>Megabombus pennsylvanicus</i> )                               | 4.0.E-80  | 815 | 72  | 296 | 275 | 236 | 212 | 2.8 |
| 52 | Androgen-dependent TFPI-regulating protein<br>( <i>Mesocricetus auratus</i> )         | 5.0.E-17  | 815 | 266 | 193 | 114 | 157 | 29  | 4.2 |
| 53 | FAD-dependent oxidoreductase domain-containing protein ( <i>Bos taurus</i> )          | 3.0.E-18  | 772 | 59  | 182 | 164 | 115 | 77  | 4.2 |
| 54 | Lambda-crystallin ( <i>Rattus norvegicus</i> )                                        | 4.0.E-58  | 711 | 150 | 182 | 155 | 144 | 77  | 3.9 |
| 55 | Excitatory amino acid transporter<br>( <i>Ambystoma tigrinum</i> )                    | 2.0.E-135 | 700 | 218 | 258 | 198 | 195 | 141 | 2.7 |
| 56 | Serpin ( <i>Homo sapiens</i> )                                                        | 1.0.E-61  | 688 | 152 | 268 | 261 | 213 | 145 | 2.6 |
| 57 | 15-hydroxyprostaglandin dehydrogenase<br>( <i>Rattus norvegicus</i> )                 | 6.0.E-39  | 685 | 72  | 159 | 93  | 115 | 80  | 4.3 |
| 58 | Acyl-protein thioesterase ( <i>Homo sapiens</i> )                                     | 7.0.E-59  | 670 | 133 | 142 | 63  | 78  | 32  | 4.7 |
| 59 | unknown                                                                               |           | 668 | 42  | 157 | 128 | 122 | 82  | 4.3 |
| 60 | unknown                                                                               |           | 653 | 136 | 167 | 231 | 240 | 165 | 3.9 |
| 61 | Uncharacterized protein<br>( <i>Acanthamoeba polyphaga mimivirus</i> )                | 9.0.E-06  | 642 | 309 | 127 | 118 | 141 | 22  | 5.1 |
| 62 | Phytanoyl-CoA dioxygenase domain-containing protein ( <i>Caenorhabditis elegans</i> ) | 2.0.E-78  | 640 | 105 | 192 | 245 | 222 | 129 | 3.3 |
| 63 | unknown                                                                               |           | 561 | 127 | 232 | 148 | 134 | 160 | 2.4 |
| 64 | UDP-glucuronosyltransferase<br>( <i>Oryctolagus cuniculus</i> )                       | 2.0.E-57  | 558 | 76  | 145 | 61  | 62  | 26  | 3.9 |
| 65 | UDP-glucuronosyltransferase ( <i>Homo sapiens</i> )                                   | 3.0.E-70  | 551 | 37  | 141 | 45  | 44  | 30  | 3.9 |
| 66 | Acid phosphatase ( <i>Macaca fascicularis</i> )                                       | 2.0.E-52  | 551 | 88  | 246 | 180 | 164 | 153 | 2.2 |
| 67 | Tumor protein ( <i>Homo sapiens</i> )                                                 | 1.0.E-21  | 546 | 205 | 237 | 230 | 238 | 163 | 2.3 |
| 68 | Alpha-tocopherol transfer protein<br>( <i>Pongo abelii</i> )                          | 8.0.E-18  | 543 | 30  | 131 | 66  | 44  | 33  | 4.2 |
| 69 | Yellow-c ( <i>Drosophila melanogaster</i> )                                           | 1.0.E-100 | 522 | 27  | 122 | 67  | 51  | 38  | 4.3 |
| 70 | Short/branched chain specific acyl-CoA<br>dehydrogenase ( <i>Mus musculus</i> )       | 9.0.E-168 | 501 | 168 | 179 | 193 | 203 | 97  | 2.8 |
| 71 | GMP reductase ( <i>Homo sapiens</i> )                                                 | 5.0.E-180 | 496 | 141 | 170 | 246 | 220 | 142 | 2.9 |
| 72 | N-acetyl-D-glucosamine kinase<br>( <i>Mus musculus</i> )                              | 2.0.E-67  | 482 | 150 | 186 | 178 | 216 | 128 | 2.6 |
| 73 | unknown                                                                               |           | 475 | 14  | 157 | 14  | 15  | 6   | 3.0 |
| 74 | Spatzle ( <i>Drosophila melanogaster</i> )                                            | 7.0.E-20  | 474 | 100 | 135 | 131 | 143 | 105 | 3.5 |
| 75 | unknown                                                                               |           | 469 | 171 | 156 | 141 | 191 | 142 | 3.0 |
| 76 | Dopa decarboxylase<br>( <i>Drosophila melanogaster</i> )                              | 0         | 468 | 105 | 146 | 169 | 160 | 95  | 3.2 |
| 77 | unknown                                                                               |           | 467 | 93  | 135 | 74  | 67  | 42  | 3.5 |
| 78 | Xylulose kinase ( <i>Homo sapiens</i> )                                               | 0         | 432 | 128 | 155 | 159 | 161 | 113 | 2.8 |
| 79 | unknown                                                                               |           | 432 | 5   | 85  | 48  | 38  | 26  | 5.1 |
| 80 | Pro-X carboxypeptidase ( <i>Bos taurus</i> )                                          | 4.0.E-156 | 418 | 107 | 116 | 118 | 104 | 65  | 3.6 |
| 81 | Innexin ( <i>Drosophila melanogaster</i> )                                            | 3.0.E-91  | 417 | 101 | 123 | 108 | 106 | 69  | 3.4 |
| 82 | Regucalcin ( <i>Xenopus laevis</i> )                                                  | 1.0.E-56  | 402 | 96  | 134 | 85  | 63  | 38  | 3.0 |
| 83 | Dehydrogenase/reductase ( <i>Gallus gallus</i> )                                      | 3.0.E-48  | 395 | 61  | 120 | 81  | 79  | 60  | 3.3 |
| 84 | Riboflavin kinase ( <i>Drosophila melanogaster</i> )                                  | 7.0.E-53  | 383 | 73  | 139 | 102 | 104 | 93  | 2.8 |
| 85 | Cytochrome P450 6a14<br>( <i>Drosophila melanogaster</i> )                            | 1.0.E-102 | 382 | 92  | 179 | 171 | 148 | 136 | 2.1 |
| 86 | LIM/homeobox protein ( <i>Gallus gallus</i> )                                         | 6.0.E-43  | 380 | 138 | 96  | 136 | 129 | 69  | 4.0 |
| 87 | Lipase ( <i>Cavia porcellus</i> )                                                     | 1.0.E-31  | 380 | 28  | 173 | 41  | 29  | 51  | 2.2 |
| 88 | Cathepsin B ( <i>Bos taurus</i> )                                                     | 1.0.E-127 | 377 | 44  | 112 | 172 | 159 | 114 | 3.4 |
| 89 | unknown                                                                               |           | 355 | 33  | 123 | 96  | 82  | 85  | 2.9 |
| 90 | Triacylglycerol lipase ( <i>Sus scrofa</i> )                                          | 6.0.E-92  | 350 | 54  | 76  | 40  | 40  | 18  | 4.6 |
| 91 | unknown                                                                               |           | 350 | 101 | 140 | 141 | 124 | 123 | 2.5 |
| 92 | Delta-1-pyrroline-5-carboxylate synthase<br>( <i>Mus musculus</i> )                   | 0         | 337 | 101 | 101 | 95  | 92  | 49  | 3.3 |



|     |                                                                            |           |     |     |     |     |     |     |     |
|-----|----------------------------------------------------------------------------|-----------|-----|-----|-----|-----|-----|-----|-----|
| 93  | L-threonine dehydratase catabolic TdcB<br>( <i>Staphylococcus aureus</i> ) | 3.0.E-42  | 333 | 36  | 118 | 68  | 72  | 93  | 2.8 |
| 94  | unknown                                                                    |           | 328 | 111 | 92  | 108 | 130 | 130 | 3.6 |
| 95  | PRELI domain-containing protein<br>( <i>Mus musculus</i> )                 | 4.0.E-13  | 325 | 46  | 78  | 63  | 74  | 47  | 4.2 |
| 96  | Nogo-B receptor ( <i>Danio rerio</i> )                                     | 7.0.E-15  | 317 | 88  | 79  | 63  | 70  | 44  | 4.0 |
| 97  | GMP reductase ( <i>Homo sapiens</i> )                                      | 4.0.E-24  | 312 | 85  | 89  | 143 | 126 | 83  | 3.5 |
| 98  | Myrosinase ( <i>Brevicoryne brassicae</i> )                                | 3.0.E-69  | 308 | 38  | 66  | 15  | 23  | 7   | 4.7 |
| 99  | Cytochrome b5-related protein<br>( <i>Drosophila melanogaster</i> )        | 2.0.E-74  | 304 | 62  | 131 | 107 | 124 | 101 | 2.3 |
| 100 | unknown                                                                    |           | 304 | 27  | 60  | 23  | 18  | 4   | 5.0 |
| 101 | 2-acylglycerol O-acyltransferase<br>( <i>Mus musculus</i> )                | 3.0.E-12  | 304 | 91  | 73  | 86  | 94  | 48  | 4.2 |
| 102 | Spondin ( <i>Mus musculus</i> )                                            | 1.0.E-92  | 302 | 56  | 101 | 132 | 129 | 94  | 3.0 |
| 103 | Glucose-6-phosphate 1-dehydrogenase<br>( <i>Homo sapiens</i> )             | 0         | 299 | 122 | 115 | 89  | 107 | 78  | 2.6 |
| 104 | unknown                                                                    |           | 295 | 66  | 84  | 95  | 118 | 85  | 3.5 |
| 105 | UDP-glucuronosyltransferase ( <i>Homo sapiens</i> )                        | 8.0.E-80  | 294 | 43  | 112 | 113 | 102 | 92  | 2.6 |
| 106 | unknown                                                                    |           | 289 | 125 | 112 | 140 | 137 | 90  | 2.6 |
| 107 | Serpin ( <i>Homo sapiens</i> )                                             | 3.0.E-62  | 289 | 79  | 139 | 112 | 113 | 105 | 2.1 |
| 108 | Solute carrier organic anion transporter<br>( <i>Mus musculus</i> )        | 4.0.E-79  | 289 | 94  | 110 | 143 | 113 | 70  | 2.6 |
| 109 | Lysosome membrane protein<br>( <i>Rattus norvegicus</i> )                  | 2.0.E-52  | 288 | 100 | 87  | 93  | 92  | 66  | 3.3 |
| 110 | Angiotensin-converting enzyme<br>( <i>Gallus gallus</i> )                  | 0         | 286 | 65  | 81  | 70  | 81  | 39  | 3.5 |
| 111 | Bombyxin ( <i>Samia cynthia</i> )                                          | 2.0.E-07  | 278 | 15  | 58  | 36  | 32  | 24  | 4.8 |
| 112 | unknown                                                                    |           | 270 | 31  | 68  | 23  | 22  | 8   | 4.0 |
| 113 | Lambda-crystallin ( <i>Mus musculus</i> )                                  | 7.0.E-10  | 264 | 50  | 65  | 65  | 48  | 28  | 4.0 |
| 114 | Dehydrogenase/reductase ( <i>Mus musculus</i> )                            | 1.0.E-64  | 259 | 48  | 63  | 26  | 23  | 11  | 4.1 |
| 115 | Methylthioribose-1-phosphate isomerase<br>( <i>Aedes aegypti</i> )         | 7.0.E-174 | 248 | 112 | 110 | 99  | 103 | 75  | 2.3 |
| 116 | Sialin ( <i>Homo sapiens</i> )                                             | 2.0.E-99  | 248 | 102 | 106 | 123 | 118 | 109 | 2.3 |
| 117 | unknown                                                                    |           | 246 | 30  | 102 | 40  | 39  | 26  | 2.4 |
| 118 | Neuronal acetylcholine receptor<br>( <i>Rattus norvegicus</i> )            | 6.0.E-27  | 244 | 51  | 52  | 51  | 51  | 22  | 4.7 |
| 119 | unknown                                                                    |           | 235 | 42  | 73  | 85  | 65  | 46  | 3.2 |
| 120 | Vitellogenin ( <i>Oscheius brevesophaga</i> )                              | 2.0.E-24  | 233 | 35  | 83  | 77  | 73  | 46  | 2.8 |
| 121 | Glycogen synthase<br>( <i>Drosophila melanogaster</i> )                    | 0         | 233 | 60  | 69  | 85  | 85  | 53  | 3.4 |
| 122 | Trehalose transporter<br>( <i>Culex quinquefasciatus</i> )                 | 2.0.E-52  | 230 | 21  | 78  | 83  | 69  | 62  | 2.9 |
| 123 | unknown                                                                    |           | 218 | 17  | 37  | 9   | 11  | 3   | 5.9 |
| 124 | Myrosinase ( <i>Brevicoryne brassicae</i> )                                | 2.0.E-60  | 214 | 24  | 50  | 12  | 15  | 4   | 4.3 |
| 125 | UDP-glucuronosyltransferase<br>( <i>Rattus norvegicus</i> )                | 3.0.E-55  | 211 | 18  | 58  | 42  | 40  | 22  | 3.7 |
| 126 | unknown                                                                    |           | 208 | 32  | 47  | 26  | 31  | 14  | 4.4 |
| 127 | unknown                                                                    |           | 207 | 41  | 86  | 78  | 77  | 64  | 2.4 |
| 128 | Glycine cleavage system H protein<br>( <i>Drosophila melanogaster</i> )    | 4.0.E-50  | 202 | 77  | 77  | 86  | 93  | 75  | 2.6 |
| 129 | Retinaldehyde-binding protein<br>( <i>Homo sapiens</i> )                   | 9.0.E-16  | 202 | 6   | 42  | 19  | 11  | 9   | 4.8 |
| 130 | MFS-type transporter ( <i>Mus musculus</i> )                               | 4.0.E-68  | 191 | 30  | 79  | 67  | 73  | 63  | 2.4 |
| 131 | Nicotinate phosphoribosyltransferase<br>( <i>Drosophila melanogaster</i> ) | 0         | 189 | 69  | 82  | 66  | 78  | 55  | 2.3 |
| 132 | unknown                                                                    |           | 186 | 41  | 43  | 52  | 43  | 34  | 4.4 |
| 133 | UDP-glucuronosyltransferase<br>( <i>Oryctolagus cuniculus</i> )            | 2.0.E-72  | 185 | 70  | 64  | 67  | 61  | 47  | 2.9 |
| 134 | unknown                                                                    |           | 183 | 32  | 43  | 47  | 33  | 20  | 4.3 |
| 135 | unknown                                                                    |           | 176 | 70  | 66  | 52  | 52  | 44  | 2.7 |
| 136 | Scavenger receptor ( <i>Rattus norvegicus</i> )                            | 5.0.E-66  | 174 | 56  | 76  | 76  | 79  | 47  | 2.3 |

|     |                                                                                                                   |           |     |    |    |    |    |    |     |
|-----|-------------------------------------------------------------------------------------------------------------------|-----------|-----|----|----|----|----|----|-----|
| 137 | unknown                                                                                                           |           | 173 | 36 | 60 | 60 | 55 | 51 | 2.9 |
| 138 | unknown                                                                                                           |           | 172 | 60 | 66 | 62 | 65 | 62 | 2.6 |
| 139 | Gonadotropin-releasing hormone II receptor<br>( <i>Clarias gariepinus</i> )                                       | 1.0.E-65  | 166 | 45 | 62 | 73 | 76 | 46 | 2.7 |
| 140 | Chondroitin sulfate synthase ( <i>Mus musculus</i> )                                                              | 0         | 165 | 23 | 55 | 17 | 19 | 11 | 3.0 |
| 141 | 15-hydroxyprostaglandin dehydrogenase<br>( <i>Homo sapiens</i> )                                                  | 1.0.E-31  | 158 | 44 | 47 | 24 | 34 | 17 | 3.4 |
| 142 | Angiotensin-converting enzyme<br>( <i>Mus musculus</i> )                                                          | 6.0.E-15  | 156 | 34 | 44 | 29 | 40 | 19 | 3.5 |
| 143 | Adenine phosphoribosyltransferase<br>( <i>Drosophila pseudoobscura</i> )                                          | 4.0.E-46  | 156 | 54 | 74 | 64 | 67 | 60 | 2.1 |
| 144 | Cathepsin D ( <i>Mus musculus</i> )                                                                               | 2.0.E-45  | 156 | 44 | 54 | 57 | 74 | 44 | 2.9 |
| 145 | Alpha-N-acetylgalactosaminidase<br>( <i>Gallus gallus</i> )                                                       | 3.0.E-133 | 150 | 60 | 62 | 56 | 68 | 45 | 2.4 |
| 146 | UDP-glucuronosyltransferase ( <i>Mus musculus</i> )                                                               | 2.0.E-63  | 150 | 61 | 48 | 52 | 69 | 41 | 3.1 |
| 147 | Ornithine transporter ( <i>Homo sapiens</i> )                                                                     | 4.0.E-38  | 148 | 21 | 41 | 37 | 29 | 24 | 3.6 |
| 148 | Kynurenine-oxoglutarate transaminase<br>( <i>Homo sapiens</i> )                                                   | 2.0.E-152 | 146 | 57 | 57 | 57 | 64 | 39 | 2.6 |
| 149 | Box A-binding factor<br>( <i>Drosophila melanogaster</i> )                                                        | 1.0.E-25  | 143 | 69 | 56 | 62 | 62 | 27 | 2.6 |
| 150 | unknown                                                                                                           |           | 142 | 70 | 32 | 33 | 36 | 10 | 4.4 |
| 151 | Cationic amino acid transporter<br>( <i>Gallus gallus</i> )                                                       | 4.0.E-124 | 141 | 32 | 35 | 46 | 37 | 23 | 4.0 |
| 152 | Trehalose transporter<br>( <i>Polypedilum vanderplanki</i> )                                                      | 5.0.E-51  | 140 | 23 | 51 | 60 | 58 | 52 | 2.8 |
| 153 | Thiol reductase ( <i>Homo sapiens</i> )                                                                           | 6.0.E-13  | 138 | 38 | 51 | 48 | 47 | 26 | 2.7 |
| 154 | Hydroxypyruvate isomerase ( <i>Danio rerio</i> )                                                                  | 2.0.E-75  | 138 | 54 | 53 | 66 | 67 | 46 | 2.6 |
| 155 | Lipoamide acyltransferase component of<br>branched-chain alpha-keto acid<br>dehydrogenase ( <i>Mus musculus</i> ) | 4.0.E-102 | 136 | 49 | 42 | 56 | 52 | 33 | 3.2 |
| 156 | unknown                                                                                                           |           | 133 | 23 | 36 | 35 | 39 | 26 | 3.7 |
| 157 | unknown                                                                                                           |           | 133 | 32 | 34 | 31 | 43 | 20 | 3.9 |
| 158 | unknown                                                                                                           |           | 130 | 8  | 45 | 5  | 5  | 1  | 2.9 |
| 159 | unknown                                                                                                           |           | 129 | 5  | 36 | 7  | 6  | 4  | 3.6 |
| 160 | Peroxidase ( <i>Drosophila melanogaster</i> )                                                                     | 2.0.E-64  | 128 | 40 | 47 | 15 | 23 | 6  | 2.7 |
| 161 | Inorganic phosphate cotransporter<br>( <i>Drosophila ananassae</i> )                                              | 4.0.E-98  | 128 | 54 | 49 | 46 | 50 | 26 | 2.6 |
| 162 | MFS-type transporter ( <i>Homo sapiens</i> )                                                                      | 6.0.E-76  | 126 | 34 | 38 | 51 | 45 | 28 | 3.3 |
| 163 | unknown                                                                                                           |           | 125 | 19 | 34 | 34 | 34 | 20 | 3.6 |
| 164 | Cysteine dioxygenase ( <i>Danio rerio</i> )                                                                       | 4.0.E-73  | 123 | 38 | 38 | 53 | 58 | 24 | 3.3 |
| 165 | Clotting factor ( <i>Tachypleus tridentatus</i> )                                                                 | 2.0.E-31  | 122 | 36 | 49 | 54 | 51 | 35 | 2.5 |
| 166 | Glutamate transporter ( <i>Bos taurus</i> )                                                                       | 2.0.E-113 | 122 | 34 | 37 | 38 | 38 | 20 | 3.3 |
| 167 | Beta-galactosidase ( <i>Canis familiaris</i> )                                                                    | 2.0.E-162 | 120 | 26 | 39 | 32 | 28 | 18 | 3.1 |
| 168 | unknown                                                                                                           |           | 114 | 35 | 43 | 38 | 42 | 38 | 2.7 |
| 169 | Serine carboxypeptidase ( <i>Apis mellifera</i> )                                                                 | 2.0.E-146 | 112 | 56 | 43 | 50 | 54 | 28 | 2.6 |
| 170 | unknown                                                                                                           |           | 112 | 41 | 30 | 31 | 45 | 20 | 3.8 |
| 171 | Thiamine transporter ( <i>Homo sapiens</i> )                                                                      | 2.0.E-78  | 112 | 42 | 41 | 31 | 44 | 29 | 2.8 |
| 172 | unknown                                                                                                           |           | 110 | 5  | 26 | 6  | 5  | 6  | 4.3 |
| 173 | unknown                                                                                                           |           | 110 | 30 | 25 | 26 | 24 | 11 | 4.4 |
| 174 | Esterase ( <i>Myzus persicae</i> )                                                                                | 5.0.E-76  | 106 | 32 | 34 | 25 | 27 | 19 | 3.2 |
| 175 | Glucosylceramidase ( <i>Pan troglodytes</i> )                                                                     | 5.0.E-135 | 106 | 29 | 30 | 39 | 33 | 21 | 3.6 |
| 176 | Wnt ( <i>Xenopus laevis</i> )                                                                                     | 2.0.E-73  | 104 | 15 | 25 | 10 | 12 | 5  | 4.2 |
| 177 | UDP-glucuronosyltransferase<br>( <i>Rattus norvegicus</i> )                                                       | 2.0.E-58  | 101 | 14 | 29 | 34 | 33 | 20 | 3.5 |
| 178 | fuseless ( <i>Drosophila melanogaster</i> )                                                                       |           | 99  | 13 | 45 | 40 | 38 | 33 | 2.2 |
| 179 | Elastase inhibitor ( <i>Mus musculus</i> )                                                                        | 2.0.E-59  | 98  | 19 | 35 | 27 | 23 | 16 | 2.8 |
| 180 | unknown                                                                                                           |           | 97  | 22 | 25 | 24 | 24 | 17 | 3.9 |
| 181 | Thymidine phosphorylase ( <i>Rattus norvegicus</i> )                                                              | 1.0.E-96  | 97  | 28 | 25 | 37 | 33 | 19 | 3.9 |
| 182 | UDP-glucuronosyltransferase<br>( <i>Canis familiaris</i> )                                                        | 6.0.E-72  | 93  | 25 | 35 | 22 | 22 | 20 | 2.7 |
| 183 | Dehydrogenase/reductase ( <i>Gallus gallus</i> )                                                                  | 4.0.E-42  | 92  | 24 | 31 | 22 | 20 | 17 | 3.0 |

|     |                                                                                 |           |    |    |    |    |    |    |     |
|-----|---------------------------------------------------------------------------------|-----------|----|----|----|----|----|----|-----|
| 184 | Dehydrogenase/reductase ( <i>Gallus gallus</i> )                                | 8.0.E-47  | 92 | 17 | 26 | 21 | 17 | 8  | 3.5 |
| 185 | unknown                                                                         |           | 92 | 10 | 31 | 15 | 15 | 10 | 3.0 |
| 186 | unknown                                                                         |           | 91 | 1  | 15 | 3  | 5  | 5  | 6.0 |
| 187 | Cation transport regulator-like protein<br>( <i>Danio rerio</i> )               | 3.0.E-44  | 90 | 13 | 28 | 24 | 23 | 24 | 3.2 |
| 188 | ATP-binding cassette sub-family<br>( <i>Mus musculus</i> )                      | 7.0.E-133 | 88 | 12 | 20 | 17 | 15 | 11 | 4.4 |
| 189 | unknown                                                                         |           | 86 | 35 | 32 | 34 | 35 | 17 | 2.7 |
| 190 | Pyrroline-5-carboxylate reductase<br>( <i>Pongo abelii</i> )                    | 2.0.E-66  | 85 | 28 | 27 | 38 | 33 | 18 | 3.2 |
| 191 | Acyl-CoA Delta desaturase ( <i>Trichoplusia ni</i> )                            | 2.0.E-100 | 84 | 12 | 26 | 14 | 14 | 4  | 3.2 |
| 192 | Yellow-c ( <i>Drosophila melanogaster</i> )                                     | 2.00E-73  | 82 | 7  | 24 | 14 | 12 | 12 | 3.3 |
| 193 | UDP-glucuronosyltransferase<br>( <i>Cavia porcellus</i> )                       | 3.0.E-70  | 80 | 34 | 23 | 22 | 28 | 14 | 3.5 |
| 194 | Ion transport peptide ( <i>Schistocerca gregaria</i> )                          | 2.0.E-41  | 80 | 18 | 26 | 28 | 29 | 31 | 3.0 |
| 195 | unknown                                                                         |           | 79 | 6  | 23 | 22 | 12 | 5  | 3.4 |
| 196 | Retinol dehydrogenase ( <i>Homo sapiens</i> )                                   | 7.0.E-75  | 79 | 28 | 24 | 29 | 27 | 20 | 3.2 |
| 197 | unknown                                                                         |           | 78 | 11 | 25 | 20 | 26 | 22 | 3.2 |
| 198 | unknown                                                                         |           | 78 | 29 | 30 | 23 | 23 | 19 | 2.6 |
| 199 | Carboxypeptidase ( <i>Rickettsia conorii</i> )                                  | 1.0.E-34  | 78 | 8  | 33 | 20 | 22 | 17 | 2.4 |
| 200 | Trehalose transporter ( <i>Drosophila willistoni</i> )                          | 4.0.E-42  | 77 | 16 | 34 | 22 | 23 | 14 | 2.3 |
| 201 | unknown                                                                         |           | 76 | 18 | 16 | 15 | 16 | 6  | 4.8 |
| 202 | Kynurenine/alpha-aminoadipate<br>aminotransferase ( <i>Bos taurus</i> )         | 3.0.E-95  | 76 | 25 | 21 | 23 | 20 | 12 | 3.5 |
| 203 | unknown                                                                         |           | 75 | 8  | 22 | 6  | 7  | 4  | 3.4 |
| 204 | ATP-binding cassette sub-family<br>( <i>Homo sapiens</i> )                      | 1.0.E-157 | 74 | 37 | 21 | 18 | 24 | 6  | 3.5 |
| 205 | Glycine dehydrogenase ( <i>Homo sapiens</i> )                                   | 0         | 74 | 11 | 27 | 18 | 18 | 12 | 2.7 |
| 206 | Alpha-mannosidase ( <i>Macaca fascicularis</i> )                                | 0         | 72 | 17 | 28 | 28 | 25 | 19 | 2.5 |
| 207 | Cysteine dioxygenase ( <i>Danio rerio</i> )                                     | 3.0.E-73  | 71 | 22 | 20 | 33 | 32 | 26 | 3.5 |
| 208 | unknown                                                                         |           | 69 | 10 | 20 | 20 | 18 | 15 | 3.5 |
| 209 | Potassium channel protein<br>( <i>Drosophila melanogaster</i> )                 | 3.0.E-76  | 69 | 20 | 31 | 28 | 27 | 21 | 2.2 |
| 210 | unknown                                                                         |           | 68 | 4  | 25 | 8  | 4  | 3  | 2.8 |
| 211 | UDP-glucuronosyltransferase<br>( <i>Rattus norvegicus</i> )                     | 1.0.E-50  | 67 | 27 | 28 | 29 | 29 | 23 | 2.4 |
| 212 | Potassium channel ( <i>Gallus gallus</i> )                                      | 8.0.E-117 | 66 | 14 | 21 | 16 | 15 | 11 | 3.1 |
| 213 | Alpha-N-acetylgalactosaminidase<br>( <i>Gallus gallus</i> )                     | 3.0.E-133 | 65 | 12 | 17 | 12 | 9  | 6  | 3.8 |
| 214 | unknown                                                                         |           | 64 | 23 | 18 | 16 | 20 | 8  | 3.5 |
| 215 | Lipase ( <i>Drosophila melanogaster</i> )                                       | 9.0.E-90  | 63 | 20 | 25 | 20 | 22 | 15 | 2.5 |
| 216 | D-alanine-D-alanine ligase ( <i>Rickettsia bellii</i> )                         | 3.0.E-176 | 63 | 12 | 28 | 18 | 18 | 11 | 2.3 |
| 217 | unknown                                                                         |           | 62 | 5  | 19 | 19 | 17 | 18 | 3.3 |
| 218 | Glycoprotein 3-alpha-L-fucosyltransferase<br>( <i>Drosophila melanogaster</i> ) | 3.0.E-101 | 62 | 4  | 22 | 11 | 8  | 8  | 2.8 |
| 219 | Metalloproteinase ( <i>Mus musculus</i> )                                       | 1.0.E-87  | 61 | 11 | 22 | 16 | 13 | 8  | 2.7 |
| 220 | Clotting factor ( <i>Tachypleus tridentatus</i> )                               | 7.0.E-23  | 60 | 7  | 19 | 26 | 22 | 17 | 3.2 |
| 221 | unknown                                                                         |           | 57 | 7  | 20 | 23 | 17 | 18 | 2.8 |
| 222 | Acetyl-coenzyme A transporter<br>( <i>Rattus norvegicus</i> )                   | 6.0.E-128 | 57 | 4  | 18 | 14 | 12 | 9  | 3.2 |
| 223 | unknown                                                                         |           | 56 | 25 | 21 | 21 | 21 | 8  | 2.6 |
| 224 | unknown                                                                         |           | 56 | 16 | 27 | 19 | 17 | 9  | 2.1 |
| 225 | Acyl-CoA Delta desaturase ( <i>Trichoplusia ni</i> )                            | 1.0.E-72  | 53 | 2  | 10 | 2  | 2  | 0  | 5.2 |
| 226 | unknown                                                                         |           | 52 | 13 | 14 | 13 | 9  | 6  | 3.7 |
| 227 | unknown                                                                         |           | 51 | 2  | 16 | 3  | 4  | 3  | 3.3 |
| 228 | Allatostatin-A receptor ( <i>Bombyx mori</i> )                                  | 1.0.E-89  | 51 | 15 | 24 | 22 | 19 | 17 | 2.2 |
| 229 | BDNF/NT-3 growth factors receptor<br>( <i>Gallus gallus</i> )                   | 9.0.E-83  | 51 | 16 | 19 | 16 | 15 | 8  | 2.7 |
| 230 | Cytochrome P450 6a2<br>( <i>Drosophila melanogaster</i> )                       | 4.0.E-72  | 51 | 16 | 20 | 22 | 21 | 23 | 2.6 |
| 231 | CG32112 ( <i>Drosophila melanogaster</i> )                                      | 5.0.E-148 | 50 | 20 | 25 | 24 | 24 | 22 | 2.1 |

|     |                                                                                                    |           |    |    |    |    |    |    |     |
|-----|----------------------------------------------------------------------------------------------------|-----------|----|----|----|----|----|----|-----|
| 232 | unknown                                                                                            |           | 50 | 14 | 18 | 12 | 19 | 14 | 2.7 |
| 233 | Wos2 ( <i>Schizosaccharomyces pombe</i> )                                                          | 9.0.E-19  | 50 | 2  | 16 | 5  | 3  | 1  | 3.1 |
| 234 | Beta-glucosidase ( <i>Oryza sativa</i> )                                                           | 4.0.E-10  | 49 | 6  | 6  | 0  | 2  | 0  | 8.4 |
| 235 | unknown                                                                                            |           | 49 | 6  | 13 | 19 | 24 | 13 | 3.7 |
| 236 | unknown                                                                                            |           | 48 | 11 | 15 | 12 | 10 | 4  | 3.2 |
| 237 | unknown                                                                                            |           | 47 | 8  | 10 | 18 | 22 | 14 | 5.0 |
| 238 | Beta-galactosidase ( <i>Mus musculus</i> )                                                         | 1.0.E-10  | 45 | 7  | 10 | 10 | 10 | 9  | 4.5 |
| 239 | unknown                                                                                            |           | 43 | 8  | 14 | 16 | 18 | 12 | 3.0 |
| 240 | Serine/threonine-protein phosphatase 6 regulatory ankyrin repeat subunit A ( <i>Homo sapiens</i> ) | 3.0.E-91  | 42 | 12 | 16 | 5  | 6  | 2  | 2.6 |
| 241 | unknown                                                                                            |           | 41 | 1  | 14 | 4  | 2  | 1  | 2.8 |
| 242 | UDP-glucuronosyltransferase ( <i>Rattus norvegicus</i> )                                           | 1.0.E-54  | 41 | 6  | 12 | 10 | 9  | 8  | 3.3 |
| 243 | unknown                                                                                            |           | 38 | 7  | 17 | 13 | 15 | 14 | 2.2 |
| 244 | unknown                                                                                            |           | 38 | 2  | 7  | 5  | 6  | 4  | 5.4 |
| 245 | TELO2-interacting protein ( <i>Mus musculus</i> )                                                  | 2.0.E-12  | 37 | 2  | 11 | 7  | 8  | 6  | 3.2 |
| 246 | LIM homeobox transcription factor ( <i>Mesocricetus auratus</i> )                                  | 2.0.E-14  | 36 | 4  | 7  | 2  | 4  | 1  | 5.6 |
| 247 | unknown                                                                                            |           | 35 | 12 | 12 | 14 | 11 | 10 | 3.0 |
| 248 | unknown                                                                                            |           | 34 | 6  | 10 | 12 | 15 | 14 | 3.6 |
| 249 | Not2 ( <i>Xenopus laevis</i> )                                                                     | 2.0.E-24  | 34 | 3  | 8  | 6  | 6  | 5  | 4.5 |
| 250 | unknown                                                                                            |           | 34 | 9  | 7  | 9  | 12 | 4  | 5.1 |
| 251 | UDP-glucuronosyltransferase ( <i>Rattus norvegicus</i> )                                           | 3.0.E-56  | 33 | 5  | 9  | 15 | 14 | 10 | 3.8 |
| 252 | CG7120 ( <i>Drosophila melanogaster</i> )                                                          | 2.0.E-107 | 33 | 16 | 12 | 11 | 14 | 7  | 2.7 |
| 253 | Serine/threonine-protein kinase ( <i>Drosophila melanogaster</i> )                                 | 8.0.E-56  | 33 | 7  | 13 | 10 | 9  | 5  | 2.5 |
| 254 | TELO2-interacting protein ( <i>Homo sapiens</i> )                                                  | 1.0.E-86  | 31 | 11 | 11 | 10 | 12 | 9  | 2.8 |
| 255 | unknown                                                                                            |           | 31 | 5  | 6  | 8  | 5  | 7  | 5.1 |
| 256 | Myrosinase ( <i>Brevicoryne brassicae</i> )                                                        | 4.0.E-49  | 29 | 7  | 7  | 3  | 4  | 1  | 4.1 |
| 257 | Acyl-coenzyme A thioesterase ( <i>Mus musculus</i> )                                               | 3.0.E-31  | 28 | 3  | 5  | 1  | 2  | 1  | 5.1 |
| 258 | unknown                                                                                            |           | 28 | 5  | 13 | 4  | 9  | 4  | 2.1 |
| 259 | unknown                                                                                            |           | 28 | 14 | 6  | 5  | 7  | 3  | 4.7 |
| 260 | unknown                                                                                            |           | 27 | 11 | 10 | 8  | 9  | 6  | 2.6 |
| 261 | unknown                                                                                            |           | 27 | 6  | 4  | 4  | 5  | 3  | 6.4 |
| 262 | Acyl-CoA Delta desaturase ( <i>Trichoplusia ni</i> )                                               | 8.0.E-102 | 27 | 2  | 3  | 1  | 1  | 0  | 8.1 |
| 263 | Myrosinase ( <i>Brevicoryne brassicae</i> )                                                        | 2.0.E-16  | 25 | 3  | 4  | 1  | 4  | 0  | 6.0 |
| 264 | unknown                                                                                            |           | 24 | 1  | 4  | 1  | 1  | 0  | 5.5 |
| 265 | unknown                                                                                            |           | 24 | 6  | 12 | 8  | 10 | 7  | 2.0 |
| 266 | PRELI domain-containing protein ( <i>Mus musculus</i> )                                            | 7.0.E-11  | 22 | 5  | 5  | 6  | 8  | 3  | 4.4 |
| 267 | unknown                                                                                            |           | 22 | 2  | 5  | 2  | 1  | 1  | 4.8 |
| 268 | 2-hydroxyacylsphingosine 1-beta-galactosyltransferase ( <i>Rattus norvegicus</i> )                 | 3.0.E-15  | 22 | 6  | 7  | 4  | 4  | 1  | 3.1 |
| 269 | Glycerol-3-phosphate acyltransferase ( <i>Rattus norvegicus</i> )                                  | 4.0.E-38  | 21 | 3  | 7  | 3  | 5  | 5  | 3.2 |
| 270 | RING finger and transmembrane domain-containing protein ( <i>Mus musculus</i> )                    | 2.0.E-42  | 21 | 2  | 8  | 6  | 6  | 4  | 2.6 |
| 271 | Krueppel ( <i>Mus musculus</i> )                                                                   | 1.0.E-37  | 20 | 4  | 4  | 3  | 4  | 2  | 4.6 |
| 272 | CG6761 ( <i>Drosophila melanogaster</i> )                                                          | 3.0E-101  | 20 | 1  | 7  | 2  | 2  | 1  | 2.7 |
| 273 | Peroxidase ( <i>Drosophila melanogaster</i> )                                                      | 5.0.E-70  | 20 | 1  | 4  | 2  | 2  | 1  | 4.6 |
| 274 | Amnionless ( <i>Mus musculus</i> )                                                                 | 1.0.E-27  | 20 | 4  | 5  | 6  | 5  | 3  | 3.8 |
| 275 | unknown                                                                                            |           | 20 | 9  | 6  | 5  | 5  | 3  | 3.1 |
| 276 | unknown                                                                                            |           | 19 | 3  | 6  | 5  | 6  | 6  | 3.0 |
| 277 | unknown                                                                                            |           | 18 | 4  | 4  | 6  | 6  | 5  | 4.2 |
| 278 | Ninjurin ( <i>Mus musculus</i> )                                                                   | 4.0.E-09  | 18 | 7  | 7  | 5  | 5  | 2  | 2.8 |
| 279 | UDP-glucuronosyltransferase ( <i>Oryctolagus cuniculus</i> )                                       | 6.0.E-52  | 18 | 5  | 7  | 8  | 8  | 6  | 2.4 |
| 280 | unknown                                                                                            |           | 18 | 3  | 6  | 6  | 5  | 3  | 2.8 |

|     |                                                                          |           |    |   |   |   |   |   |      |
|-----|--------------------------------------------------------------------------|-----------|----|---|---|---|---|---|------|
| 281 | UDP-glucuronosyltransferase<br>( <i>Oryctolagus cuniculus</i> )          | 1.0.E-42  | 17 | 4 | 5 | 2 | 3 | 1 | 3.4  |
| 282 | unknown                                                                  |           | 17 | 1 | 3 | 2 | 1 | 0 | 5.5  |
| 283 | Cubilin ( <i>Canis familiaris</i> )                                      | 1.0.E-29  | 16 | 6 | 6 | 5 | 5 | 2 | 2.9  |
| 284 | unknown                                                                  |           | 16 | 5 | 6 | 6 | 7 | 4 | 2.5  |
| 285 | unknown                                                                  |           | 15 | 2 | 3 | 3 | 3 | 2 | 5.2  |
| 286 | Stearoyl-CoA desaturase ( <i>Bos taurus</i> )                            | 1.0.E-103 | 15 | 0 | 2 | 0 | 0 | 0 | 6.3  |
| 287 | unknown                                                                  |           | 15 | 7 | 5 | 2 | 7 | 2 | 2.9  |
| 288 | unknown                                                                  |           | 15 | 2 | 6 | 3 | 3 | 2 | 2.6  |
| 289 | unknown                                                                  |           | 13 | 4 | 2 | 1 | 2 | 1 | 7.0  |
| 290 | Ras-related protein ( <i>Oryctolagus cuniculus</i> )                     | 9.0.E-65  | 11 | 0 | 4 | 4 | 4 | 3 | 3.0  |
| 291 | unknown                                                                  |           | 11 | 0 | 3 | 1 | 1 | 0 | 4.4  |
| 292 | Cytochrome P450 6a13<br>( <i>Drosophila melanogaster</i> )               | 4.0.E-102 | 11 | 3 | 3 | 2 | 2 | 1 | 4.2  |
| 293 | Retrovirus-related Pol polyprotein<br>( <i>Drosophila melanogaster</i> ) | 2.0.E-11  | 11 | 2 | 3 | 2 | 3 | 1 | 3.9  |
| 294 | unknown                                                                  |           | 11 | 4 | 4 | 3 | 5 | 1 | 2.9  |
| 295 | unknown                                                                  |           | 9  | 0 | 2 | 0 | 0 | 0 | 4.9  |
| 296 | Retrovirus-related Pol polyprotein<br>( <i>Drosophila melanogaster</i> ) | 4.0.E-06  | 9  | 2 | 3 | 1 | 2 | 3 | 2.7  |
| 297 | unknown                                                                  |           | 8  | 1 | 3 | 1 | 1 | 1 | 2.4  |
| 298 | unknown                                                                  |           | 8  | 3 | 2 | 2 | 2 | 1 | 4.3  |
| 299 | unknown                                                                  |           | 8  | 0 | 3 | 1 | 3 | 2 | 2.6  |
| 300 | CG17322 ( <i>Drosophila melanogaster</i> )                               | 2.0E-53   | 7  | 1 | 2 | 3 | 2 | 1 | 3.7  |
| 301 | unknown                                                                  |           | 7  | 1 | 1 | 2 | 2 | 3 | 8.3  |
| 302 | Beta-carotene 15,15' monooxygenase<br>( <i>Gallus gallus</i> )           | 2.0.E-57  | 7  | 1 | 2 | 1 | 1 | 1 | 2.8  |
| 303 | unknown                                                                  |           | 6  | 1 | 3 | 1 | 2 | 2 | 2.4  |
| 304 | unknown                                                                  |           | 5  | 2 | 1 | 0 | 1 | 1 | 6.4  |
| 305 | Stearoyl-CoA desaturase ( <i>Bos taurus</i> )                            | 1.0.E-26  | 5  | 0 | 0 | 0 | 0 | 0 | -    |
| 306 | Retinoid isomerohydrolase<br>( <i>Rattus norvegicus</i> )                | 3.0.E-07  | 4  | 0 | 0 | 0 | 0 | 0 | 54.6 |
| 307 | Lactase-phlorizin hydrolase<br>( <i>Rattus norvegicus</i> )              | 3.0.E-30  | 4  | 1 | 1 | 0 | 1 | 0 | 2.6  |
| 308 | unknown                                                                  |           | 3  | 1 | 1 | 1 | 0 | 0 | 4.8  |
| 309 | unknown                                                                  |           | 3  | 0 | 1 | 1 | 0 | 0 | 4.6  |
| 310 | PiggyBac transposable element-derived<br>protein ( <i>Homo sapiens</i> ) | 3.0.E-06  | 3  | 0 | 0 | 0 | 0 | 0 | 22.0 |
| 311 | unknown                                                                  |           | 2  | 1 | 1 | 1 | 1 | 0 | 3.7  |
| 312 | PiggyBac transposable element-derived<br>protein ( <i>Homo sapiens</i> ) | 3.0.E-26  | 2  | 0 | 1 | 1 | 0 | 0 | 3.0  |
| 313 | unknown                                                                  |           | 2  | 0 | 0 | 0 | 0 | 0 | 10.2 |
| 314 | unknown                                                                  |           | 2  | 0 | 0 | 0 | 0 | 0 | 6.7  |
| 315 | unknown                                                                  |           | 2  | 0 | 1 | 1 | 0 | 0 | 3.1  |

<sup>a</sup>Colors highlight the following gene categories: red, PO and related genes; blue, RCP and related genes; green, lipid-related genes; orange, sugar-related genes.

**Table S3.** Gene ontology categories enriched in LGC-dominant genes.

| GO ID      | Term                                                 | FDR     | Ontology           |
|------------|------------------------------------------------------|---------|--------------------|
| GO:0044281 | small molecule metabolic process                     | 4.1E-06 | Biological process |
| GO:0016042 | lipid catabolic process                              | 4.2E-05 | Biological process |
| GO:1901605 | alpha-amino acid metabolic process                   | 1.0E-03 | Biological process |
| GO:0055114 | oxidation-reduction process                          | 1.7E-03 | Biological process |
| GO:0006082 | organic acid metabolic process                       | 1.7E-03 | Biological process |
| GO:0005975 | carbohydrate metabolic process                       | 5.1E-03 | Biological process |
| GO:0009071 | serine family amino acid catabolic process           | 1.9E-02 | Biological process |
| GO:0044242 | cellular lipid catabolic process                     | 2.7E-02 | Biological process |
| GO:0009110 | vitamin biosynthetic process                         | 3.0E-02 | Biological process |
| GO:0006629 | lipid metabolic process                              | 3.3E-02 | Biological process |
| GO:0009225 | nucleotide-sugar metabolic process                   | 4.5E-02 | Biological process |
| GO:0003824 | catalytic activity                                   | 6.0E-09 | Molecular function |
| GO:0016757 | transferase activity, transferring glycosyl groups   | 3.9E-05 | Molecular function |
| GO:0016758 | transferase activity, transferring hexosyl groups    | 3.1E-04 | Molecular function |
| GO:0004553 | hydrolase activity, hydrolyzing O-glycosyl compounds | 4.3E-04 | Molecular function |
| GO:0016491 | oxidoreductase activity                              | 4.3E-04 | Molecular function |
| GO:0016798 | hydrolase activity, acting on glycosyl bonds         | 7.0E-04 | Molecular function |
| GO:0052689 | carboxylic ester hydrolase activity                  | 2.2E-02 | Molecular function |

**Table S4.** Highly-expressed genes in *A. pisum* tissues identified by RNA-seq analysis.

|    | AphidBase <sup>a</sup> | Function <sup>a</sup>                                          | HC <sup>b</sup> | WB <sup>b</sup> | Ratio (HC/WB) <sup>b</sup> |
|----|------------------------|----------------------------------------------------------------|-----------------|-----------------|----------------------------|
| 1  | ACYPI002789            | Collagen                                                       | 15078           | 858             | 17.6                       |
| 2  | <b>ACYPI001367</b>     | <b>Phenoloxidase</b>                                           | 8904            | 341             | 26.1                       |
| 3  | ACYPI004656            | Collagen                                                       | 8473            | 468             | 18.1                       |
| 4  | ACYPI009912            | Actin                                                          | 6753            | 2340            | 2.9                        |
| 5  | ACYPI001359            | SPARC                                                          | 6269            | 353             | 17.8                       |
| 6  | ACYPI083140            | Uncharacterized protein                                        | 5652            | 1483            | 3.8                        |
| 7  | ACYPI003478            | Hemocytin                                                      | 4411            | 39              | 113.2                      |
| 8  | ACYPI086030            | Uncharacterized protein                                        | 4222            | 1025            | 4.1                        |
| 9  | <b>ACYPI004484</b>     | <b>Phenoloxidase</b>                                           | 4151            | 140             | 29.6                       |
| 10 | ACYPI009414            | Uncharacterized protein                                        | 3676            | 1173            | 3.1                        |
| 11 | ACYPI073884            | Glutamine synthetase                                           | 3288            | 1506            | 2.2                        |
| 12 | ACYPI004672            | Omega amidase                                                  | 3162            | 775             | 4.1                        |
| 13 | ACYPI001736            | Uncharacterized protein                                        | 2970            | 120             | 24.7                       |
| 14 | ACYPI001864            | Uncharacterized protein                                        | 2489            | 390             | 6.4                        |
| 15 | ACYPI082655            | Aspartic protease                                              | 2380            | 208             | 11.4                       |
| 16 | ACYPI001483            | Echinoderm microtubule-associated protein                      | 2369            | 169             | 14.0                       |
| 17 | ACYPI003572            | Myophilin                                                      | 2359            | 418             | 5.6                        |
| 18 | ACYPI008158            | Gelsolin                                                       | 2253            | 577             | 3.9                        |
| 19 | ACYPI008989            | GILT-like protein                                              | 2137            | 656             | 3.3                        |
| 20 | ACYPI001365            | Chitinase                                                      | 2003            | 855             | 2.3                        |
| 21 | ACYPI081126            | Uncharacterized protein                                        | 1973            | 610             | 3.2                        |
| 22 | ACYPI009721            | Histone                                                        | 1860            | 196             | 9.5                        |
| 23 | ACYPI006974            | Cathepsin L                                                    | 1823            | 538             | 3.4                        |
| 24 | ACYPI087208            | Uncharacterized protein                                        | 1820            | 314             | 5.8                        |
| 25 | ACYPI56425             | Uncharacterized protein                                        | 1792            | 68              | 26.4                       |
| 26 | ACYPI003244            | Papilin                                                        | 1730            | 77              | 22.5                       |
| 27 | ACYPI28737             | 60S ribosomal protein                                          | 1556            | 38              | 41.0                       |
| 28 | ACYPI082627            | Uncharacterized protein                                        | 1530            | 342             | 4.5                        |
| 29 | ACYPI008487            | Uncharacterized protein                                        | 1495            | 31              | 48.4                       |
| 30 | ACYPI081449            | Laminin                                                        | 1487            | 120             | 12.4                       |
| 31 | ACYPI008657            | Glutathione S-transferase                                      | 1478            | 467             | 3.2                        |
| 32 | ACYPI34442             | Uncharacterized protein                                        | 1412            | 514             | 2.7                        |
| 33 | ACYPI086042            | Uncharacterized protein                                        | 1410            | 453             | 3.1                        |
| 34 | ACYPI001378            | Amino acid transporter                                         | 1376            | 477             | 2.9                        |
| 35 | ACYPI009011            | Fatty acid-binding protein                                     | 1361            | 365             | 3.7                        |
| 36 | ACYPI001776            | Laminin                                                        | 1328            | 143             | 9.3                        |
| 37 | ACYPI009530            | Integral membrane protein                                      | 1277            | 445             | 2.9                        |
| 38 | ACYPI004906            | Leucine-rich repeats and immunoglobulin-like domains protein 1 | 1273            | 109             | 11.7                       |
| 39 | ACYPI001993            | Serine protease                                                | 1247            | 39              | 32.0                       |
| 40 | ACYPI50923             | Fibulin                                                        | 1230            | 21              | 59.5                       |
| 41 | ACYPI28373             | Uncharacterized protein                                        | 1217            | 65              | 18.8                       |
| 42 | ACYPI007421            | Uncharacterized protein                                        | 1217            | 28              | 43.0                       |
| 43 | ACYPI064152            | Collagen                                                       | 1152            | 72              | 16.0                       |
| 44 | ACYPI088246            | Uncharacterized protein                                        | 1134            | 221             | 5.1                        |
| 45 | ACYPI004891            | Peptidylprolyl isomerase B                                     | 1120            | 551             | 2.0                        |
| 46 | ACYPI008883            | Glutamate transporter                                          | 1120            | 13              | 87.0                       |
| 47 | ACYPI089272            | Uncharacterized protein                                        | 1083            | 163             | 6.6                        |
| 48 | ACYPI001380            | Acetylcholine receptor                                         | 1036            | 28              | 36.8                       |
| 49 | ACYPI001274            | Excitatory amino acid transporter                              | 1006            | 258             | 3.9                        |
| 50 | ACYPI010019            | Laminin                                                        | 998             | 99              | 10.1                       |

|    | AphidBase <sup>a</sup> | Function <sup>a</sup>                       | FB <sup>b</sup> | WB <sup>b</sup> | Ratio (FB/WB) <sup>b</sup> |
|----|------------------------|---------------------------------------------|-----------------|-----------------|----------------------------|
| 1  | ACYPI004672            | Omega-amidase                               | 12792           | 775             | 16.5                       |
| 2  | ACYPI003223            | Odorant-binding protein                     | 12684           | 1385            | 9.2                        |
| 3  | ACYPI000294            | Uncharacterized protein                     | 12123           | 657             | 18.4                       |
| 4  | ACYPI005249            | Uncharacterized protein                     | 11040           | 2369            | 4.7                        |
| 5  | <b>ACYPI086030</b>     | <b>Uncharacterized protein</b>              | 10968           | 1025            | 10.7                       |
| 6  | ACYPI081676            | Uncharacterized protein                     | 8148            | 347             | 23.5                       |
| 7  | ACYPI009769            | Glyceraldehyde-3-phosphate dehydrogenase    | 7399            | 3539            | 2.1                        |
| 8  | ACYPI009030            | Uncharacterized protein                     | 7323            | 1285            | 5.7                        |
| 9  | ACYPI060629            | Uncharacterized protein                     | 7134            | 371             | 19.3                       |
| 10 | ACYPI083140            | Uncharacterized protein                     | 7125            | 1483            | 4.8                        |
| 11 | ACYPI004796            | Uncharacterized protein                     | 6393            | 1593            | 4.0                        |
| 12 | ACYPI009414            | Uncharacterized protein                     | 5731            | 1173            | 4.9                        |
| 13 | ACYPI087473            | Aldehyde dehydrogenase                      | 5550            | 339             | 16.4                       |
| 14 | ACYPI066751            | Uncharacterized protein                     | 5526            | 974             | 5.7                        |
| 15 | ACYPI000057            | Xylulose reductase                          | 5397            | 909             | 5.9                        |
| 16 | ACYPI005806            | Enolase                                     | 5247            | 1128            | 4.7                        |
| 17 | ACYPI007027            | Fructose-bisphosphate aldolase              | 5159            | 1430            | 3.6                        |
| 18 | ACYPI073884            | Glutamine synthetase                        | 4442            | 1506            | 2.9                        |
| 19 | ACYPI081559            | Uncharacterized protein                     | 4343            | 1749            | 2.5                        |
| 20 | ACYPI080203            | Uncharacterized protein                     | 4026            | 146             | 27.6                       |
| 21 | ACYPI001461            | Glutamine synthetase                        | 3807            | 1154            | 3.3                        |
| 22 | ACYPI061541            | Uncharacterized protein                     | 3325            | 143             | 23.2                       |
| 23 | ACYPI083147            | Uncharacterized protein                     | 3257            | 485             | 6.7                        |
| 24 | ACYPI53781             | Uncharacterized protein                     | 3091            | 1537            | 2.0                        |
| 25 | ACYPI073004            | Uncharacterized protein                     | 3035            | 273             | 11.1                       |
| 26 | ACYPI006784            | L-threonine dehydratase catabolic TdcB      | 2880            | 448             | 6.4                        |
| 27 | ACYPI008389            | Uncharacterized protein                     | 2872            | 1089            | 2.6                        |
| 28 | ACYPI007294            | Uncharacterized protein                     | 2753            | 139             | 19.8                       |
| 29 | ACYPI085343            | Uncharacterized protein                     | 2747            | 114             | 24.1                       |
| 30 | ACYPI002175            | Lysozyme                                    | 2663            | 1303            | 2.0                        |
| 31 | ACYPI007254            | Uncharacterized protein                     | 2654            | 407             | 6.5                        |
| 32 | ACYPI002789            | collagen                                    | 2653            | 858             | 3.1                        |
| 33 | ACYPI008106            | Ornithine decarboxylase                     | 2649            | 934             | 2.8                        |
| 34 | ACYPI001365            | Chitinase                                   | 2642            | 855             | 3.1                        |
| 35 | ACYPI085855            | Uncharacterized protein                     | 2576            | 66              | 38.9                       |
| 36 | ACYPI008158            | Gelsolin                                    | 2575            | 577             | 4.5                        |
| 37 | ACYPI006984            | Spermidine synthase                         | 2322            | 704             | 3.3                        |
| 38 | ACYPI005016            | Serpin                                      | 2154            | 346             | 6.2                        |
| 39 | ACYPI008569            | Apolipoprotein                              | 2152            | 399             | 5.4                        |
| 40 | ACYPI005113            | Cytochrome P450 4g15                        | 2128            | 867             | 2.5                        |
| 41 | <b>ACYPI005732</b>     | <b>Uncharacterized protein</b>              | 2004            | 63              | 31.7                       |
| 42 | ACYPI069547            | UTP-glucose-1-phosphate uridylyltransferase | 1950            | 650             | 3.0                        |
| 43 | ACYPI004689            | Uncharacterized protein                     | 1912            | 319             | 6.0                        |
| 44 | ACYPI007739            | Uncharacterized protein                     | 1906            | 536             | 3.6                        |
| 45 | ACYPI010135            | Hexokinase                                  | 1879            | 766             | 2.5                        |
| 46 | ACYPI000376            | Cysteine proteinase                         | 1869            | 418             | 4.5                        |
| 47 | ACYPI001378            | Amino acid transporter                      | 1858            | 477             | 3.9                        |
| 48 | ACYPI000007            | Adenosylmethionine decarboxylase            | 1842            | 604             | 3.1                        |
| 49 | ACYPI004546            | Glutamate-cysteine ligase                   | 1766            | 231             | 7.6                        |
| 50 | ACYPI008065            | Fatty acid synthase                         | 1765            | 454             | 3.9                        |

<sup>a</sup>Colors highlight the following gene categories: red, PO genes; blue, RCP-related genes; green, lipid-related genes; orange, sugar-related genes.

<sup>b</sup>HC, hemocyte; FB, fat body; WB, whole body.



**Table S5.** Expression levels of *Buchnera* Nmo genes identified by RNA-seq analysis.

|    | Location | Gene/protein (putative)         | TPM (mean, n=3) |
|----|----------|---------------------------------|-----------------|
| 1  | Chr      | cspE                            | 624,620         |
| 2  | Chr      | yba3                            | 133,742         |
| 3  | Chr      | dapD                            | 19,957          |
| 4  | Chr      | groEL                           | 18,605          |
| 5  | pLeu     | ibpA                            | 14,458          |
| 6  | Chr      | dnaK                            | 10,393          |
| 7  | Chr      | rpsU                            | 8,899           |
| 8  | Chr      | groES                           | 8,463           |
| 9  | Chr      | csrA                            | 7,711           |
| 10 | Chr      | fis                             | 4,767           |
| 11 | Chr      | ahpC                            | 4,125           |
| 12 | Chr      | ydhD                            | 4,051           |
| 13 | Chr      | dnaJ                            | 4,001           |
| 14 | Chr      | yba2                            | 3,852           |
| 15 | Chr      | gapA                            | 3,146           |
| 16 | Chr      | tufB                            | 2,662           |
| 17 | Chr      | rho                             | 2,561           |
| 18 | Chr      | ptsH                            | 2,031           |
| 19 | Chr      | rpsJ                            | 1,798           |
| 20 | Chr      | hypothetical protein BUCNMO_041 | 1,757           |
| 21 | Chr      | rpmF                            | 1,749           |
| 22 | Chr      | dapF                            | 1,729           |
| 23 | Chr      | rpsI                            | 1,603           |
| 24 | Chr      | yciA                            | 1,567           |
| 25 | Chr      | <b>aroE</b>                     | 1,531           |
| 26 | Chr      | metE                            | 1,435           |
| 27 | Chr      | metK                            | 1,419           |
| 28 | Chr      | dut                             | 1,374           |
| 29 | Chr      | <b>aroC</b>                     | 1,364           |
| 30 | Chr      | hslU                            | 1,329           |
| 31 | Chr      | bacA                            | 1,328           |
| 32 | Chr      | argH                            | 1,229           |
| 33 | Chr      | tsf                             | 1,227           |
| 34 | Chr      | ssb                             | 1,210           |
| 35 | Chr      | pfkA                            | 1,194           |
| 36 | Chr      | tldD                            | 1,174           |
| 37 | Chr      | tktB                            | 1,152           |
| 38 | Chr      | <b>eno</b>                      | 1,121           |
| 39 | Chr      | rpiA                            | 1,076           |
| 40 | Chr      | rplC                            | 1,034           |
| 41 | Chr      | trxA                            | 1,010           |
| 42 | pLeu     | repA1                           | 993             |
| 43 | Chr      | himD                            | 921             |
| 44 | Chr      | mt                              | 905             |
| 45 | Chr      | rplB                            | 864             |
| 46 | Chr      | ptsG                            | 822             |
| 47 | Chr      | htrA                            | 814             |
| 48 | Chr      | ribB                            | 809             |
| 49 | Chr      | ppa                             | 796             |
| 50 | Chr      | norM                            | 789             |

|     | Location | Gene/protein (putative) | TPM (mean, n=3) |
|-----|----------|-------------------------|-----------------|
| 51  | Chr      | yabI                    | 745             |
| 52  | Chr      | rplL                    | 741             |
| 53  | Chr      | gyrB                    | 724             |
| 54  | Chr      | rplM                    | 702             |
| 55  | Chr      | tadA                    | 692             |
| 56  | Chr      | glyQ                    | 682             |
| 57  | Chr      | nuoB                    | 680             |
| 58  | Chr      | rpsP                    | 665             |
| 59  | Chr      | rpsL                    | 660             |
| 60  | Chr      | orn                     | 659             |
| 61  | Chr      | hisD                    | 649             |
| 62  | Chr      | argA                    | 629             |
| 63  | Chr      | rpsO                    | 597             |
| 64  | Chr      | adk                     | 592             |
| 65  | Chr      | atpE                    | 590             |
| 66  | Chr      | rpsK                    | 577             |
| 67  | Chr      | gloB                    | 568             |
| 68  | Chr      | nusG                    | 568             |
| 69  | Chr      | tilS                    | 565             |
| 70  | Chr      | rplT                    | 563             |
| 71  | Chr      | flgI                    | 553             |
| 72  | pTrp     | trpG                    | 548             |
| 73  | Chr      | rnc                     | 543             |
| 74  | Chr      | infC                    | 531             |
| 75  | Chr      | sohB                    | 514             |
| 76  | Chr      | hflB                    | 512             |
| 77  | Chr      | <b>aroK</b>             | 511             |
| 78  | Chr      | yccK                    | 510             |
| 79  | Chr      | map                     | 510             |
| 80  | Chr      | sodA                    | 503             |
| 81  | Chr      | atpD                    | 497             |
| 82  | Chr      | yoaE                    | 493             |
| 83  | Chr      | argC                    | 485             |
| 84  | Chr      | ychF                    | 483             |
| 85  | Chr      | pth                     | 480             |
| 86  | Chr      | yrbA                    | 476             |
| 87  | Chr      | ribA                    | 467             |
| 88  | Chr      | rpmH                    | 466             |
| 89  | Chr      | argD                    | 444             |
| 90  | Chr      | yhgl                    | 443             |
| 91  | Chr      | dapA                    | 440             |
| 92  | pTrp     | trpE                    | 438             |
| 93  | Chr      | crr                     | 432             |
| 94  | Chr      | truA                    | 431             |
| 95  | Chr      | gshA                    | 429             |
| 96  | Chr      | atpB                    | 427             |
| 97  | Chr      | nuoCD                   | 424             |
| 98  | Chr      | gnd                     | 420             |
| 99  | Chr      | yebD                    | 415             |
| 100 | Chr      | purA                    | 415             |
| 101 | Chr      | yjgF                    | 412             |
| 102 | Chr      | rpoD                    | 398             |
| 103 | Chr      | deaD                    | 390             |

|     | Location | Gene/protein (putative)         | TPM (mean, n=3) |
|-----|----------|---------------------------------|-----------------|
| 104 | Chr      | rplD                            | 385             |
| 105 | Chr      | hypothetical protein BUCNMO_154 | 383             |
| 106 | Chr      | rplJ                            | 382             |
| 107 | Chr      | rpsM                            | 381             |
| 108 | Chr      | thrC                            | 374             |
| 109 | Chr      | nuoF                            | 373             |
| 110 | Chr      | cyoE                            | 370             |
| 111 | Chr      | htpX                            | 370             |
| 112 | Chr      | rnhA                            | 368             |
| 113 | Chr      | lon                             | 354             |
| 114 | Chr      | rplA                            | 354             |
| 115 | Chr      | lgt                             | 350             |
| 116 | Chr      | rplK                            | 349             |
| 117 | Chr      | rpsA                            | 347             |
| 118 | Chr      | flgG                            | 347             |
| 119 | Chr      | rpmA                            | 346             |
| 120 | Chr      | yhbZ                            | 345             |
| 121 | Chr      | ung                             | 344             |
| 122 | Chr      | flhB                            | 336             |
| 123 | Chr      | yhgN                            | 333             |
| 124 | Chr      | purH                            | 333             |
| 125 | Chr      | rsmC                            | 333             |
| 126 | Chr      | infB                            | 331             |
| 127 | Chr      | rpe                             | 324             |
| 128 | Chr      | asnS                            | 323             |
| 129 | Chr      | metF                            | 322             |
| 130 | Chr      | greA                            | 319             |
| 131 | Chr      | murE                            | 318             |
| 132 | Chr      | rpsG                            | 317             |
| 133 | Chr      | trpS                            | 316             |
| 134 | Chr      | smrB                            | 315             |
| 135 | Chr      | glyA                            | 315             |
| 136 | Chr      | ilvC                            | 305             |
| 137 | Chr      | miaA                            | 304             |
| 138 | Chr      | prsA                            | 298             |
| 139 | Chr      | rply                            | 298             |
| 140 | Chr      | ilvI                            | 294             |
| 141 | Chr      | rluD                            | 293             |
| 142 | Chr      | rpoB                            | 292             |
| 143 | Chr      | secA                            | 284             |
| 144 | Chr      | pmbA                            | 278             |
| 145 | Chr      | ygjD                            | 278             |
| 146 | Chr      | mrcB                            | 276             |
| 147 | Chr      | yb1688                          | 273             |
| 148 | Chr      | flgC                            | 273             |
| 149 | Chr      | pykA                            | 270             |
| 150 | Chr      | rpoC                            | 270             |
| 151 | Chr      | fliE                            | 270             |
| 152 | Chr      | iscU                            | 268             |
| 153 | Chr      | folD                            | 265             |
| 154 | pLeu     | leuA                            | 263             |
| 155 | Chr      | rpsN                            | 263             |
| 156 | Chr      | secY                            | 260             |

|     | Location | Gene/protein (putative)      | TPM (mean, n=3) |
|-----|----------|------------------------------|-----------------|
| 157 | Chr      | rpmE                         | 259             |
| 158 | Chr      | fabI                         | 251             |
| 159 | Chr      | nif3-like protein BUCNMO 237 | 250             |
| 160 | Chr      | hslV                         | 248             |
| 161 | pLeu     | yqhA                         | 247             |
| 162 | pLeu     | leuD                         | 247             |
| 163 | Chr      | lipA                         | 246             |
| 164 | Chr      | sbcB                         | 245             |
| 165 | Chr      | rpoA                         | 245             |
| 166 | Chr      | gidA                         | 242             |
| 167 | Chr      | murA                         | 239             |
| 168 | Chr      | <b>aroB</b>                  | 236             |
| 169 | Chr      | fusA                         | 236             |
| 170 | Chr      | rpmJ                         | 236             |
| 171 | Chr      | apaH                         | 235             |
| 172 | Chr      | smpB                         | 229             |
| 173 | Chr      | nuoI                         | 228             |
| 174 | Chr      | gshB                         | 227             |
| 175 | Chr      | pcnB                         | 227             |
| 176 | Chr      | clpP                         | 226             |
| 177 | Chr      | trmD                         | 226             |
| 178 | Chr      | atpA                         | 225             |
| 179 | Chr      | rnhB                         | 225             |
| 180 | Chr      | flgH                         | 224             |
| 181 | Chr      | cysS                         | 222             |
| 182 | Chr      | rplS                         | 221             |
| 183 | Chr      | acpS                         | 220             |
| 184 | Chr      | hisS                         | 219             |
| 185 | Chr      | rplW                         | 219             |
| 186 | Chr      | bioA                         | 218             |
| 187 | Chr      | lepA                         | 217             |
| 188 | Chr      | hisG                         | 216             |
| 189 | Chr      | nuoH                         | 215             |
| 190 | Chr      | rpsE                         | 215             |
| 191 | Chr      | pgi                          | 214             |
| 192 | Chr      | thrB                         | 214             |
| 193 | Chr      | ribH                         | 213             |
| 194 | Chr      | rluC                         | 212             |
| 195 | Chr      | asd                          | 210             |
| 196 | Chr      | grpE                         | 210             |
| 197 | Chr      | fabB                         | 207             |
| 198 | Chr      | yabC                         | 206             |
| 199 | Chr      | mviN                         | 204             |
| 200 | Chr      | rpsD                         | 203             |
| 201 | Chr      | <b>aroD(Q)</b>               | 202             |
| 202 | Chr      | rpsT                         | 200             |
| 203 | Chr      | ybaB                         | 200             |
| 204 | Chr      | aceE                         | 198             |
| 205 | Chr      | rpmB                         | 197             |
| 206 | Chr      | fba                          | 196             |
| 207 | Chr      | rplU                         | 196             |
| 208 | Chr      | rpsR                         | 195             |
| 209 | Chr      | argE                         | 194             |

|     | Location | Gene/protein (putative) | TPM (mean, n=3) |
|-----|----------|-------------------------|-----------------|
| 210 | Chr      | rpsB                    | 193             |
| 211 | Chr      | flgA                    | 191             |
| 212 | Chr      | <b>aroH</b>             | 190             |
| 213 | Chr      | cyoB                    | 188             |
| 214 | Chr      | rpmI                    | 187             |
| 215 | Chr      | rpsF                    | 187             |
| 216 | Chr      | metG                    | 187             |
| 217 | Chr      | tgt                     | 185             |
| 218 | Chr      | rpsC                    | 184             |
| 219 | Chr      | dnaQ                    | 184             |
| 220 | Chr      | ydc                     | 183             |
| 221 | Chr      | yajR                    | 181             |
| 222 | Chr      | frr                     | 180             |
| 223 | Chr      | grpE1                   | 180             |
| 224 | Chr      | cmk                     | 180             |
| 225 | Chr      | <b>aroA</b>             | 178             |
| 226 | Chr      | bioD                    | 176             |
| 227 | Chr      | ilvD                    | 176             |
| 228 | Chr      | nfo                     | 176             |
| 229 | Chr      | rnpA                    | 174             |
| 230 | Chr      | rplE                    | 173             |
| 231 | Chr      | trmU                    | 171             |
| 232 | Chr      | lig                     | 171             |
| 233 | Chr      | fliQ                    | 170             |
| 234 | Chr      | dnaG                    | 169             |
| 235 | Chr      | rplQ                    | 169             |
| 236 | Chr      | atpF                    | 169             |
| 237 | Chr      | htpG                    | 169             |
| 238 | Chr      | cca                     | 168             |
| 239 | Chr      | rpsS                    | 168             |
| 240 | Chr      | dapE                    | 167             |
| 241 | Chr      | gmK                     | 167             |
| 242 | Chr      | secE                    | 166             |
| 243 | Chr      | trpB                    | 165             |
| 244 | Chr      | flgD                    | 164             |
| 245 | pLeu     | leuC                    | 164             |
| 246 | Chr      | rplP                    | 164             |
| 247 | Chr      | rpsH                    | 163             |
| 248 | Chr      | rplF                    | 163             |
| 249 | Chr      | bioH                    | 161             |
| 250 | Chr      | yche                    | 161             |
| 251 | Chr      | trxB                    | 158             |
| 252 | Chr      | dnaT                    | 158             |
| 253 | Chr      | yciL                    | 158             |
| 254 | Chr      | argB                    | 155             |
| 255 | Chr      | ptsI                    | 154             |
| 256 | Chr      | thrS                    | 150             |
| 257 | Chr      | iscS                    | 146             |
| 258 | Chr      | cyoA                    | 146             |
| 259 | Chr      | phrB                    | 146             |
| 260 | Chr      | yheM                    | 145             |
| 261 | Chr      | hemK                    | 145             |
| 262 | Chr      | lepB                    | 145             |

|     | Location | Gene/protein (putative) | TPM (mean, n=3) |
|-----|----------|-------------------------|-----------------|
| 263 | Chr      | argF                    | 144             |
| 264 | Chr      | dnaB                    | 143             |
| 265 | pLeu     | leuB                    | 143             |
| 266 | Chr      | rplN                    | 142             |
| 267 | Chr      | yleA                    | 141             |
| 268 | Chr      | tmk                     | 141             |
| 269 | Chr      | gpmA                    | 141             |
| 270 | Chr      | rnb                     | 140             |
| 271 | Chr      | pnp                     | 140             |
| 272 | Chr      | rplV                    | 139             |
| 273 | Chr      | nuoG                    | 139             |
| 274 | Chr      | typA                    | 137             |
| 275 | Chr      | ybhE                    | 136             |
| 276 | Chr      | folC                    | 135             |
| 277 | Chr      | rplR                    | 134             |
| 278 | Chr      | flgJ                    | 134             |
| 279 | Chr      | <b>talA</b>             | 134             |
| 280 | Chr      | ileS                    | 133             |
| 281 | Chr      | ftsY                    | 133             |
| 282 | Chr      | nuoA                    | 131             |
| 283 | Chr      | pepA                    | 131             |
| 284 | Chr      | lpdA                    | 130             |
| 285 | Chr      | dnaC                    | 129             |
| 286 | Chr      | flhA                    | 129             |
| 287 | Chr      | cyoD                    | 129             |
| 288 | Chr      | murD                    | 127             |
| 289 | Chr      | prfA                    | 125             |
| 290 | Chr      | dnaX                    | 125             |
| 291 | Chr      | ybeY                    | 125             |
| 292 | Chr      | nuoE                    | 125             |
| 293 | Chr      | trpC                    | 124             |
| 294 | Chr      | rpmG                    | 123             |
| 295 | Chr      | mutY                    | 121             |
| 296 | Chr      | fpr                     | 118             |
| 297 | Chr      | fliO                    | 117             |
| 298 | Chr      | rplO                    | 116             |
| 299 | Chr      | pgk                     | 116             |
| 300 | Chr      | serC                    | 116             |
| 301 | Chr      | nuoM                    | 115             |
| 302 | Chr      | ftsJ                    | 113             |
| 303 | Chr      | gyrA                    | 113             |
| 304 | Chr      | sucA                    | 111             |
| 305 | Chr      | lipB                    | 109             |
| 306 | Chr      | serS                    | 107             |
| 307 | Chr      | rimM                    | 105             |
| 308 | Chr      | ackA                    | 105             |
| 309 | Chr      | yhhF                    | 104             |
| 310 | Chr      | dnaE                    | 104             |
| 311 | Chr      | thrA                    | 104             |
| 312 | Chr      | valS                    | 103             |
| 313 | Chr      | atpH                    | 103             |
| 314 | Chr      | uppS                    | 103             |
| 315 | Chr      | yeaZ                    | 102             |

|     | Location | Gene/protein (putative) | TPM (mean, n=3) |
|-----|----------|-------------------------|-----------------|
| 316 | Chr      | hisF                    | 102             |
| 317 | Chr      | glnS                    | 102             |
| 318 | Chr      | yfgK                    | 101             |
| 319 | Chr      | yihA                    | 101             |
| 320 | Chr      | dksA                    | 101             |
| 321 | Chr      | yqgF                    | 99              |
| 322 | Chr      | era                     | 99              |
| 323 | Chr      | gltX                    | 99              |
| 324 | Chr      | proS                    | 98              |
| 325 | Chr      | nrdA                    | 98              |
| 326 | Chr      | yidC                    | 98              |
| 327 | Chr      | flgF                    | 97              |
| 328 | Chr      | rep                     | 97              |
| 329 | Chr      | rpoH                    | 96              |
| 330 | Chr      | purB                    | 95              |
| 331 | Chr      | fliH                    | 94              |
| 332 | Chr      | argG                    | 93              |
| 333 | Chr      | fldA                    | 93              |
| 334 | Chr      | nuoJ                    | 92              |
| 335 | Chr      | carA                    | 92              |
| 336 | Chr      | aceF                    | 90              |
| 337 | Chr      | trpA                    | 89              |
| 338 | Chr      | prfB                    | 89              |
| 339 | Chr      | hisB                    | 88              |
| 340 | Chr      | rpsQ                    | 88              |
| 341 | Chr      | nuoL                    | 88              |
| 342 | Chr      | yehA                    | 87              |
| 343 | Chr      | murF                    | 86              |
| 344 | Chr      | nuoK                    | 86              |
| 345 | Chr      | aspS                    | 85              |
| 346 | Chr      | hisI                    | 85              |
| 347 | Chr      | flgB                    | 85              |
| 348 | Chr      | ribD1                   | 85              |
| 349 | Chr      | fnt                     | 84              |
| 350 | Chr      | carB                    | 82              |
| 351 | Chr      | yggH                    | 82              |
| 352 | Chr      | yhhP                    | 81              |
| 353 | Chr      | polA                    | 81              |
| 354 | Chr      | fliR                    | 81              |
| 355 | Chr      | yggX                    | 80              |
| 356 | Chr      | def                     | 80              |
| 357 | Chr      | zwf                     | 80              |
| 358 | Chr      | murC                    | 79              |
| 359 | Chr      | pta                     | 78              |
| 360 | Chr      | leuS                    | 76              |
| 361 | Chr      | ygfZ                    | 75              |
| 362 | Chr      | ilvH                    | 74              |
| 363 | Chr      | fliI                    | 72              |
| 364 | Chr      | rplI                    | 70              |
| 365 | Chr      | recD                    | 70              |
| 366 | Chr      | alaS                    | 69              |
| 367 | Chr      | fabD                    | 68              |
| 368 | Chr      | fabG                    | 68              |

|     | Location | Gene/protein (putative)         | TPM (mean, n=3) |
|-----|----------|---------------------------------|-----------------|
| 369 | Chr      | dsbA                            | 68              |
| 370 | Chr      | argS                            | 68              |
| 371 | Chr      | rpmD                            | 67              |
| 372 | Chr      | ksgA                            | 67              |
| 373 | Chr      | yggB                            | 67              |
| 374 | Chr      | pheT                            | 67              |
| 375 | Chr      | dapB                            | 67              |
| 376 | Chr      | <b>pheA</b>                     | 67              |
| 377 | Chr      | fabZ                            | 67              |
| 378 | Chr      | bioB                            | 66              |
| 379 | Chr      | rplX                            | 66              |
| 380 | Chr      | fliN                            | 66              |
| 381 | Chr      | ribE                            | 65              |
| 382 | Chr      | tpiA                            | 64              |
| 383 | Chr      | ybeX                            | 63              |
| 384 | Chr      | nusA                            | 63              |
| 385 | Chr      | atpC                            | 62              |
| 386 | Chr      | atpG                            | 62              |
| 387 | Chr      | mraY                            | 61              |
| 388 | Chr      | clpX                            | 61              |
| 389 | Chr      | dnaN                            | 60              |
| 390 | Chr      | <b>hisC</b>                     | 59              |
| 391 | Chr      | flh                             | 59              |
| 392 | Chr      | pheS                            | 58              |
| 393 | Chr      | murG                            | 58              |
| 394 | Chr      | yceA                            | 57              |
| 395 | Chr      | nusB                            | 57              |
| 396 | Chr      | fig-like protein BUCNMO_223     | 57              |
| 397 | Chr      | sucB                            | 56              |
| 398 | Chr      | cyoC                            | 56              |
| 399 | Chr      | efp                             | 55              |
| 400 | Chr      | yheN                            | 53              |
| 401 | Chr      | fdx                             | 53              |
| 402 | Chr      | secG                            | 51              |
| 403 | Chr      | nth                             | 51              |
| 404 | Chr      | infA                            | 50              |
| 405 | Chr      | hisA                            | 48              |
| 406 | Chr      | hisH                            | 48              |
| 407 | Chr      | nrdB                            | 48              |
| 408 | Chr      | glyS                            | 46              |
| 409 | Chr      | lspA                            | 46              |
| 410 | Chr      | yggS                            | 45              |
| 411 | Chr      | recB                            | 45              |
| 412 | Chr      | hypothetical protein BUCNMO_168 | 44              |
| 413 | Chr      | yidD                            | 44              |
| 414 | Chr      | trpD                            | 43              |
| 415 | Chr      | lysA                            | 42              |
| 416 | Chr      | lysS                            | 42              |
| 417 | Chr      | holB                            | 41              |
| 418 | Chr      | yciC                            | 38              |
| 419 | Chr      | yggW                            | 37              |
| 420 | Chr      | ycfH                            | 37              |
| 421 | Chr      | fliM                            | 37              |



|     | Location | Gene/protein (putative)         | TPM (mean, n=3) |
|-----|----------|---------------------------------|-----------------|
| 422 | Chr      | yheL                            | 35              |
| 423 | Chr      | rpmC                            | 35              |
| 424 | Chr      | yedA                            | 34              |
| 425 | Chr      | nuoN                            | 34              |
| 426 | Chr      | thdF                            | 34              |
| 427 | Chr      | fliF                            | 32              |
| 428 | Chr      | hscB                            | 27              |
| 429 | Chr      | fliG                            | 27              |
| 430 | Chr      | holA                            | 25              |
| 431 | Chr      | yfaE                            | 24              |
| 432 | Chr      | hypothetical protein BUCNMO_280 | 24              |
| 433 | Chr      | ycfF                            | 23              |
| 434 | Chr      | flij                            | 21              |
| 435 | Chr      | rbfA                            | 19              |
| 436 | Chr      | himA                            | 19              |
| 437 | Chr      | hypothetical protein BUCNMO_060 | 17              |
| 438 | Chr      | acpP                            | 15              |
| 439 | Chr      | hypothetical protein BUCNMO_140 | 13              |

<sup>a</sup> Colors highlight the following gene categories: red, shikimate pathway genes leading to synthesis of phenylalanine; blue, enzyme genes to generate starting substrates for the tyrosine synthesis, erythrose-4-phosphate and phosphoenolpyruvate.
